# Supplementary material for: Evaluating the impact of an intervention to increase uptake of modern contraceptives among adolescent girls (15–19 years) in Nigeria, Ethiopia and Tanzania: the Adolescents 360 quasi-experimental study protocol
Source: PubMed Central journal article supplement (PMC5988138; doi:10.1136/bmjopen-2018-021834), 2018-05-31
Supplement: bmjopen-2018-021834.draft_revisions.pdf [file bmjopen-2018-021834.draft_revisions.pdf]

# BMJ Open

BMJ Open is committed to open peer review. As part of this commitment we make the peer review history of every article we publish publicly available.

When an article is published we post the peer reviewers' comments and the authors' responses online. We also post the versions of the paper that were used during peer review. These are the versions that the peer review comments apply to.

The versions of the paper that follow are the versions that were submitted during the peer review process. They are not the versions of record or the final published versions. They should not be cited or distributed as the published version of this manuscript.

BMJ Open is an open access journal and the full, final, typeset and author-corrected version of record of the manuscript is available on our site with no access controls, subscription charges or pay-per-view fees (<http://bmjopen.bmj.com>).

If you have any questions on BMJ Open's open peer review process please email [info.bmjopen@bmj.com](mailto:info.bmjopen@bmj.com)

# BMJ Open

## Evaluating the impact of an intervention to increase uptake of modern contraceptives among adolescent girls (15 to 19 years) in Nigeria, Ethiopia and Tanzania: the Adolescents 360 quasi-experimental study protocol

|                               |                                                                                                                                                                                                                                                                                                                                                                                                                                                                                                                                                                                                                                                                                                                                                                                        |
|-------------------------------|----------------------------------------------------------------------------------------------------------------------------------------------------------------------------------------------------------------------------------------------------------------------------------------------------------------------------------------------------------------------------------------------------------------------------------------------------------------------------------------------------------------------------------------------------------------------------------------------------------------------------------------------------------------------------------------------------------------------------------------------------------------------------------------|
| Journal:                      | <i>BMJ Open</i>                                                                                                                                                                                                                                                                                                                                                                                                                                                                                                                                                                                                                                                                                                                                                                        |
| Manuscript ID                 | bmjopen-2018-021834                                                                                                                                                                                                                                                                                                                                                                                                                                                                                                                                                                                                                                                                                                                                                                    |
| Article Type:                 | Protocol                                                                                                                                                                                                                                                                                                                                                                                                                                                                                                                                                                                                                                                                                                                                                                               |
| Date Submitted by the Author: | 19-Jan-2018                                                                                                                                                                                                                                                                                                                                                                                                                                                                                                                                                                                                                                                                                                                                                                            |
| Complete List of Authors:     | Atchison, Christina; London School of Hygiene and Tropical Medicine, MRC Tropical Epidemiology Group<br>Mulhern, Emma; Itad Limited<br>Kapiga, Saidi ; London School of Hygiene and Tropical Medicine, Department of Infectious Disease Epidemiology; Mwanza Intervention Trials Unit<br>Nsanya , Mussa Kelvin ; Mwanza Intervention Trials Unit<br>Crawford, Emily; Binomial Optimus Limited<br>Mussa, Mohammed ; MMA Development Consultancy<br>Bottomley, Christian ; London School of Hygiene and Tropical Medicine, MRC Tropical Epidemiology Group<br>Hargreaves, James; London School of Hygiene and Tropical Medicine, Department of Social and Environmental Health Research<br>Doyle, Aoife; London School of Hygiene and Tropical Medicine, MRC Tropical Epidemiology Group |
| Keywords:                     | Adolescents, Contraception, Evaluation, Reproductive health                                                                                                                                                                                                                                                                                                                                                                                                                                                                                                                                                                                                                                                                                                                            |
|                               |                                                                                                                                                                                                                                                                                                                                                                                                                                                                                                                                                                                                                                                                                                                                                                                        |

SCHOLARONE™  
Manuscripts

1  
2  
3 **Evaluating the impact of an intervention to increase uptake of modern contraceptives among**  
4 **adolescent girls (15 to 19 years) in Nigeria, Ethiopia and Tanzania: the Adolescents 360 quasi-**  
5 **experimental study protocol**

6 Christina J Atchison<sup>1</sup>, Emma Mulhern<sup>2</sup>, Saidi Kapiga<sup>3,4</sup>, Mussa Kelvin Nsanya<sup>4</sup>, Emily E Crawford<sup>5</sup>,  
7 Mohammed Mussa<sup>6</sup>, Christian Bottomley<sup>1</sup>, James R Hargreaves<sup>7</sup>, Aoife M Doyle<sup>1</sup>  
8  
9

10 1. London School of Hygiene and Tropical Medicine, MRC Tropical Epidemiology Group, London, UK;  
11 2. Itad Limited, Hove, UK; 3. London School of Hygiene and Tropical Medicine, Department of  
12 Infectious Disease Epidemiology, London, UK; 4. Mwanza Intervention Trials Unit, Mwanza,  
13 Tanzania; 5. Binomial Optimus Limited, Abuja, Nigeria; 6. MMA Development Consultancy  
14 Addis Ababa, Ethiopia; 7. London School of Hygiene and Tropical Medicine, Department of Social and  
15 Environmental Health Research, London, UK.  
16  
17

18 **Corresponding Author:**

19 Dr Christina J. Atchison  
20 London School of Hygiene and Tropical Medicine,  
21 MRC Tropical Epidemiology Group,  
22 London, UK  
23 Email: [Christina.Atchison@lshtm.ac.uk](mailto:Christina.Atchison@lshtm.ac.uk)  
24 Tel: +44 (0)207 612 7860  
25  
26  
27

28 **Word count:** 3,999  
29  
30

31 **Keywords:** Adolescents, Contraception, Evaluation, Reproductive health  
32  
33  
34  
35  
36  
37  
38  
39  
40  
41  
42  
43  
44  
45  
46  
47  
48  
49  
50  
51  
52  
53  
54  
55  
56  
57  
58  
59  
60

**ABSTRACT**

**Introduction:** Nigeria, Ethiopia and Tanzania have some of the highest teenage pregnancy rates, and lowest rates of modern contraceptive use among adolescents. The trans-disciplinary Adolescents 360 (A360) initiative being rolled out across these three countries uses human-centred design (HCD) to create context-specific multi-component interventions with the aim of increasing voluntary modern contraceptive use among girls aged 15 to 19 years.

**Methods:** The primary objective of the outcome evaluation is to assess the impact of A360 on the prevalence of voluntary use of modern contraception (mCPR) among sexually active girls aged 15 to 19 years. In Northern Nigeria and Ethiopia, the study population is married girls aged 15 to 19 years. In Southern Nigeria, the study population is unmarried girls aged 15 to 19 years. In Tanzania, both married and unmarried girls aged 15 to 19 years will be included in the study. In all settings, we will use a pre- and post- population-based cross-sectional survey design. In Nigeria, the study design will also include a comparison group. A two-stage sampling design will be used in all three countries. Study outcomes will be assessed before the start of A360 implementation in late 2017 and approximately 24 months after implementation in late 2019. A process evaluation, conducted throughout the two-year implementation period in the outcome evaluation areas, will provide information on the context and mechanism of the intervention, and will complement the outcome data.

**Ethics and dissemination:** The study protocol was approved by the National Health Research Ethics Committee of Nigeria, National Health Research Ethics Review sub-Committee of Tanzania, Oromia Health Bureau Research Ethical Review Committee, and the London School of Hygiene and Tropical Medicine Ethics Committee. Findings of this study will be widely disseminated through workshops, conference presentations, reports, briefings, factsheets and academic publications.

**Strengths and limitations of this study**

- This study is part of an independent multi-component impact evaluation of a multi-country adolescent sexual and reproductive health intervention, and we will collect comparable data before and after intervention implementation in four different settings in three countries.
- In Nigeria, the randomisation of intervention allocation was not possible, therefore in this quasi-experimental design conclusions about causality are less definitive than a cluster-randomised design.
- Triangulation with dose-response and trends analyses will strengthen the inference possible from the study findings.
- The process evaluation, conducted throughout the two-year implementation period, will provide information on the context and mechanism of the intervention, and will complement the outcome data.
- Due to resource constraints, we focused resources on selected geographical areas, but we acknowledge that focusing the evaluation on only a limited number of geographical areas restricts the generalisability of our findings.

## INTRODUCTION

In 2012, the global community launched the Family Planning 2020 (FP2020) initiative to reach 120 million new contraceptive users in developing countries by 2020.<sup>1</sup> Specifically, it calls for meeting all women's needs for modern contraception to prevent unintended pregnancies and reducing the high adolescent birth rates in the world's poorest countries. Helping adolescent girls avoid unintended pregnancies can have far-reaching benefits for them, their children and societies as a whole.<sup>2</sup> Complications of pregnancy and childbirth are the leading cause of death among girls aged 15 to 19,<sup>3</sup> and babies born to adolescent mothers face greater health risks than those born to older women.<sup>5</sup> Moreover, adolescent childbearing is associated with lower educational attainment, and it can perpetuate a cycle of poverty from one generation to the next.<sup>3</sup>

From 1990 to 2010, adolescent fertility rates declined in most countries.<sup>6</sup> However, adolescent fertility rates remain high in many lower income countries. In some countries, fertility rates are declining more slowly in adolescents than in older women.<sup>1</sup> Nigeria, Ethiopia and Tanzania have amongst the highest rates of adolescent fertility globally; 109, 57 and 118 births per 1,000 girls aged 15 to 19 per year, respectively.<sup>1</sup> Equally, these countries also have some of the lowest rates of use of modern contraception in adolescents. In Nigeria, 98.8% of married adolescent girls and 50.3% of unmarried sexually active adolescent girls do not use a modern contraceptive method.<sup>7</sup> The equivalent figures are 68.2% and 42.5% in Ethiopia;<sup>8</sup> and 86.7% and 66.9% in Tanzania.<sup>9</sup> Preventing pregnancy among adolescents is a global priority and new interventions are needed to achieve this, particularly in countries like Nigeria, Ethiopia and Tanzania where adolescent fertility rates remain high.

Adolescents 360 (A360) is an initiative in the field of adolescent sexual and reproductive health (ASRH) programming, with the intention of being implemented at scale in Nigeria, Ethiopia and Tanzania. The external evaluation of the A360 intervention comprises of an outcome evaluation, a process evaluation and a cost effectiveness study. We present here the study protocol for the outcome evaluation of A360. A brief description of the process evaluation will also be outlined.

## METHODS AND ANALYSIS

### Study objective

The primary objective of the outcome evaluation is to evaluate the effectiveness of the A360 programme in increasing the uptake of voluntary modern contraception among sexually active girls aged 15 to 19 years.

### Study settings

In Nigeria, A360 is being implemented by Society for Family Health (SFH)<sup>10</sup> in three states in the north (Federal Capital Territory, Nasarawa, Kaduna), and in seven states in the south (Lagos, Osun, Ogun, Oyo, Edo, Delta and Akwa Ibom) of the country. The A360 programme will be implemented in approximately 60% of the Local Government Areas (LGAs) in each selected state. We will conduct the outcome evaluation in four LGAs in Nasarawa State and two LGAs in Ogun State. Nasarawa State is a state in north central Nigeria with a total population of 1.9 million.<sup>11</sup> Overall, 41.3% of the female household population has no education, and the median age at first marriage for women is 19.7 years.<sup>7</sup> Current use of modern contraception among married women aged 15 to 49 years is 16.3%. Ogun State, in south western Nigeria has a total population of 3.8 million.<sup>11</sup> Overall, 24.1% of the female household population has no education, and the median age at first marriage for women is 20.5 years. Current use of modern contraception among married women aged 15 to 49 years is 21.5%.<sup>7</sup>

In Ethiopia, A360 is being implemented by Population Services International (PSI) in two city administrations and five regional states (Addis Ababa, Amhara, Dire Dawa, Harari, Oromia, Southern Nations, Nationalities and People's Region (SNNP) and Tigray). Within each of the selected regional states, A360 will be implemented in selected woredas (districts), and we will conduct the outcome evaluation study in four woredas in Oromia Region. Oromia Region has a total population of 27 million.<sup>12</sup> Overall, 51.5% of the female household population has no education, and the median age at first marriage for women is 17.4 years. Current use of modern contraception among married women aged 15 to 49 years is 28.1%.<sup>8</sup>

In Tanzania, A360 is being implemented by PSI in ten regions (Kagera, Geita, Mwanza, Arusha, Tabora, Tanga, Dar es Salaam, Mbeya, Iringa, and Morogoro). We will conduct the outcome evaluation in urban and semi-urban wards of Ilelele District, Mwanza Region. Mwanza Region has a total population of 2.8 million.<sup>13</sup> Overall, 24.2% of the female household population has no education, and the median age at first marriage for women is 18.9 years. Current use of modern contraception among married women aged 15 to 49 years is 18.4%.<sup>9</sup>

### Interventions under study

The A360 interventions are being designed using a human centred design (HCD) process which includes the following steps:<sup>14</sup>

1. Inspiration: a period of formative research to understand adolescent girls SRH needs and their socio-cultural environment.
2. Ideation: an iterative process of generating, testing and refining ideas, and developing and testing prototypes in real-world settings.
3. Implementation: intervention roll out at scale in target regions across the three countries.

Interventions are currently in the final round of prototyping (ideation phase). The most likely final package of interventions in each setting is described in Table 1.

Table 1. The likely final A360 package of interventions in each setting

| A360 Country    | Target population     | Intervention                                                                                                                                                                                                                                                                                                                                                                                                                                                                                                                                                                                                                                                                                                                                                                                                                                                                                                                                                                                                                                                                                                                  |
|-----------------|-----------------------|-------------------------------------------------------------------------------------------------------------------------------------------------------------------------------------------------------------------------------------------------------------------------------------------------------------------------------------------------------------------------------------------------------------------------------------------------------------------------------------------------------------------------------------------------------------------------------------------------------------------------------------------------------------------------------------------------------------------------------------------------------------------------------------------------------------------------------------------------------------------------------------------------------------------------------------------------------------------------------------------------------------------------------------------------------------------------------------------------------------------------------|
| Nigeria (North) | Married girls         | Under design at the time of writing.<br>Due to security issues during the design phase, it was not feasible to develop a context specific programme. A rapid assessment based on insights and prototypes from the other contexts is underway to determine the program to rollout in Northern Nigeria.                                                                                                                                                                                                                                                                                                                                                                                                                                                                                                                                                                                                                                                                                                                                                                                                                         |
| Nigeria (South) | Unmarried girls       | <p><b>“9ja Girls”</b></p> <ul style="list-style-type: none"> <li>- Mobilisation of girls aged 15-19 to attend 9ja Girls events by emphasizing vocational skills and life planning,</li> <li>- Sensitisation sessions in the community with mothers,</li> <li>- Community launches involving key community influencers (e.g. local government, religious leaders)</li> <li>- Physical (e.g. in a public health centre (PHCs)) and digital (e.g. online forums) safe spaces for girls,</li> <li>- PHC-based vocational skills classes focusing on job skills and life planning, including opt-out one-to-one counselling sessions with adolescent friendly providers to address fears, dispel myths, and highlight benefits of contraception. Opt out means that girls will be counselled by a service provider unless they decline,</li> <li>- PHC-based delivery of family planning products and/or referral to adolescent friendly providers.</li> </ul> <p><b>“9ja Girls”</b> will utilise clusters of PHCs, private social-franchise clinics, and stand-alone clinics in facilities donated by the Ministry of Health.</p> |
| Ethiopia        | Married girls         | <p><b>“Smart Start”</b></p> <ul style="list-style-type: none"> <li>- Community-based financial planning linked to family planning counselling sessions for newly married or soon to be married couples/girls to enable informed choice and decision making,</li> <li>- Delivered in partnership with the national Health Extension Programme via Health Extension Workers and augmented by the existing community infrastructure of the Women’s Development Army and a PSI-recruited <b>“Smart Start”</b> team and local Youth Champions,</li> <li>- Delivery of family planning products through local service providers.</li> </ul>                                                                                                                                                                                                                                                                                                                                                                                                                                                                                         |
| Tanzania        | Unmarried and married | <p><b>“Kuwa Mjanja” (Be Smart)</b></p> <ul style="list-style-type: none"> <li>- Mobilisation of girls aged 15-19 to attend <b>“Kuwa Mjanja”</b> events by emphasising vocational skills, learning about body changes and/or planning for life goals,</li> <li>- Community and clinic-based events for mothers to sensitise them to their daughters’ developmental stages associated with the desire to use contraception to prevent unwanted pregnancy in adolescent girls,</li> <li>- Pop-up and clinic-based events focusing on vocational skills and life planning for girls, including opt-out one-to-one counselling sessions with adolescent friendly providers to address fears, dispel myths, and highlight benefits of contraception. Opt out means that girls will be counselled by a service provider unless</li> </ul>                                                                                                                                                                                                                                                                                            |

|  |  |                                                                                                                                                                                                                                                                                                                                                                                                                                                                                                                                                                              |
|--|--|------------------------------------------------------------------------------------------------------------------------------------------------------------------------------------------------------------------------------------------------------------------------------------------------------------------------------------------------------------------------------------------------------------------------------------------------------------------------------------------------------------------------------------------------------------------------------|
|  |  | <p>they decline,</p> <ul style="list-style-type: none"> <li>- Community and clinic-based delivery of family planning products,</li> <li>- Sustained interaction and engagement through “<i>Kuwa Mjanja</i>” branded clubs and social media forums,</li> <li>- Club based events focusing on vocational skills, learning about their bodies, reproductive health and contraception.</li> </ul> <p>“<i>Kuwa Mjanja</i>” will utilise both public and private social-franchise clinics in partnerships with the Ministry of Health, NGOs and community-based organisations.</p> |
|--|--|------------------------------------------------------------------------------------------------------------------------------------------------------------------------------------------------------------------------------------------------------------------------------------------------------------------------------------------------------------------------------------------------------------------------------------------------------------------------------------------------------------------------------------------------------------------------------|

### Design of outcome evaluation

A summary of the methods used can be found in Table 2. Separate protocols were developed for each country to take into account the country-specific A360 implementation strategies and study designs developed.

#### Nigeria

The intervention will be evaluated in Ogun (South Nigeria) and Nasawara (North Nigeria) through population-based surveys conducted at baseline (late 2017) and approximately >24 months after the start of the intervention. In Nasawara, four LGAs consisting of two similar pairs have been selected for evaluation. Two of these will receive the intervention (one in each pair) and two will not; i.e., they will act as controls. In Ogun, the evaluation will be conducted in only two LGAs (one intervention and one control).

#### *Study unit inclusion criteria and selection*

Study states were selected by SFH. The selected states were chosen because of the absence of other adolescent focused family planning (FP) and SRH activities, and because of SFH’s previous experience working in these states.

Study LGAs were selected by SFH in collaboration with the state Ministry of Health and local government officials. The LGAs were selected from among those where there were no security concerns, and control-intervention pairs were selected to be similar with respect to some or all of the following criteria:

- Population density
- Estimated modern contraceptive prevalence rate (mCPR) among 15 to 49 year olds (DHIS2, 2016)<sup>15</sup>
- Number of health facilities
- Presence of World Bank support for Maternal and Child Health activities

#### *Allocation to intervention and comparison arms*

Within a pair, allocation of an LGA to the intervention or comparison arm of the outcome evaluation study was done by SFH in collaboration with the state Ministry of Health and local government officials.

#### Ethiopia

1  
2  
3 The intervention will be evaluated through two population-based cross sectional surveys, one  
4 conducted before implementation (late 2017) and the other after (late 2019).  
5

#### 6 *Study unit inclusion criteria and selection*

7 The study region and woredas were selected by PSI. Oromia region was selected because of its  
8 relatively low mCPR as compared to other regions in the Ethiopia DHS 2011 (24.9%), and its standing  
9 as having the highest unmet need for contraception (29.9%) as compared to other regions.<sup>16</sup> Criteria  
10 used by PSI for selecting woredas for inclusion in the study included:  
11

- 12 • Good infrastructure and accessible all year round
- 13 • Close proximity to PSI head office in Addis Ababa
- 14 • Population of married adolescent girls anticipated to be large

#### 15 Tanzania

16  
17 As in Ethiopia, the intervention will be evaluated through before-and-after population-based surveys  
18 that are scheduled to take place in late 2017 and late 2019.  
19  
20

#### 21 *Study unit inclusion criteria and selection*

22 Mwanza Region was selected by the evaluators in collaboration with PSI because of the high unmet  
23 need for modern contraception among girls aged 15 to 19 years relative to other A360 target  
24 regions,<sup>9</sup> the absence of other large-scale FP and SRH activities, and because PSI has previous  
25 experience working in the region. The study will be restricted to urban and semi-urban wards in  
26 Illemela District, in part because PSI focuses efforts in more densely populated areas, and in part  
27 because of resource constraints.  
28  
29

#### 30 **Study population**

31 A360 targets different sub-populations of adolescent girls in the three countries (Table 2).  
32  
33

#### 34 Inclusion criteria

35 Adolescent girls aged 15 to 19 years:

- 36 • Unmarried (Tanzania and Southern Nigeria only)
- 37 • Married or living as married (Ethiopia, Tanzania and Northern Nigeria only)
- 38 • Living, at the time of the survey, in the study sites
- 39 • Voluntarily provides informed consent

#### 40 Exclusion criteria

41 Adolescent girls aged 15 to 19 years:

- 42 • Unmarried (Ethiopia and Northern Nigeria only)
- 43 • Married or living as married (Southern Nigeria only)
- 44 • Not living, at the time of the survey, in the study sites
- 45 • Those who do not voluntarily provide informed consent

46  
47 Of note, married adolescent girls under 18 years of age are considered emancipated and able to  
48 provide informed consent. Therefore, no parental consent is required for this sub-population. Parent  
49 consent and adolescent girl assent is required for unmarried girls aged 15 to 17 years.  
50  
51  
52  
53  
54  
55  
56  
57  
58  
59  
60

Table 2. Summary of methods

| A360 country    | A360 regions                                                                                 | Study design                                                 | Outcome evaluation study setting                                                                                                  | Study population (sample size)                                                       | Sampling strategy                                                                                                                                                                                                                   |
|-----------------|----------------------------------------------------------------------------------------------|--------------------------------------------------------------|-----------------------------------------------------------------------------------------------------------------------------------|--------------------------------------------------------------------------------------|-------------------------------------------------------------------------------------------------------------------------------------------------------------------------------------------------------------------------------------|
| Nigeria (South) | Lagos, Osun, <b>Ogun</b> , Oyo, Edo, Delta, Akwa Ibom                                        | Cross-sectional before-and-after study with comparison group | Ogun State:<br>- Ado-Odo Ota LGA (intervention)<br>- Shagamu LGA (control)                                                        | Unmarried girls aged 15-19 years (12,000)<br><br>Co-habiting adults (250)            | Two stage design<br>PSU: Enumeration Area (EA)<br><br>Simple random sample of EAs (approx. 710 in Ogun). All HHs visited in selected EAs. All eligible girls invited to be interviewed.                                             |
| Nigeria (North) | Federal Capital Territory, Kaduna, <b>Nasarawa</b>                                           | Cross-sectional before-and-after study with comparison group | Nasarawa State:<br>- Doma LGA (intervention)<br>- Toto LGA (control)<br><br>- Karu LGA (intervention)<br>- Nasarawa LGA (control) | Married girls aged 15-19 years (4,600)<br><br>Husband/ male partner (250)            | Two stage design<br>PSU: Enumeration Area (EA)<br><br>Simple random sample of EAs (approx. 1,150 in Nasarawa). All HHs visited in selected EAs. All eligible girls invited to be interviewed.                                       |
| Ethiopia        | Addis Ababa, Amhara, Dire Dawa, Harari, <b>Oromia</b> , SNNP, Tigray                         | Cross-sectional before-and-after study                       | Oromia regional state:<br>Wara Jarso, Lome, Ada'a, Fentale woredas                                                                | Married girls aged 15-19 years (1,926)<br><br>Husband/ male partner (128)            | Two stage design<br>PSU: Kebele<br><br>Probability sample of 45 kebele (PPS). All HHs visited in selected kebele. All eligible girls invited to be interviewed.                                                                     |
| Tanzania        | Kagera, Geita, <b>Mwanza</b> , Arusha, Tabora, Tanga, Dar es Salaam, Mbeya, Iringa, Morogoro | Cross-sectional before-and-after study                       | Mwanza region:<br>Ilemela district (urban and semi-urban wards only)                                                              | Married and unmarried girls aged 15-19 years (4,980)<br><br>Co-habiting adults (127) | Two stage design<br>PSU: Street<br><br>Simple random sample (SRS) of 30 streets. SRS of 50 GPS points. All HHs with front door within 20m radius of GPS point visited. All eligible girls from those HHs invited to be interviewed. |

LGA: local government area; PSU: primary sampling unit; PPS: probability proportional to size; HH: Household; SRS: simple random sample

### Sampling strategy

A two-stage sampling design will be used in all three countries. In each country we will use the smallest available administrative unit as the primary sampling unit (PSU). Specifically, we will use enumeration areas (EAs) from the 2006 census in Nigeria, kebele from the 2007 census in Ethiopia, and streets in Tanzania.

#### Nigeria

A simple random sample of 710 EAs in Ogun and 1,150 EAs in Nasarawa will be selected. Within each EA we will sample clusters of approximately 100 households. If a selected EA contains fewer than 100 households, then we will continue the data collection in an adjoining EA until 100 households have been selected. The questionnaire will be administered to all eligible unmarried girls aged 15 to 19 years in the selected households in Ogun and all eligible married girls aged 15 to 19 years in Nasarawa. In Nasarawa, for every 17 sexually active married girls interviewed, one will be systematically selected and asked permission to interview her husband. In Ogun, due to the uncertainty in the proportion of unmarried girls who will report that they are sexually active, we propose that for every 7-14 sexually active unmarried girls surveyed, one will be systematically selected and asked permission to interview a co-habiting adult. The exact sampling interval will be finalised following the pilot study.

#### Ethiopia

A probability sample of 45 kebeles will be selected from across the four study woredas with probability proportional to population size. Within the selected kebele, we will visit each household and administer the questionnaire to all eligible married girls aged 15 to 19 years. In households that have more than one eligible married female aged 15 to 19 years, all consenting married adolescent girls will be interviewed. For every 15 sexually active married adolescent girls aged 15 to 19 years interviewed, one will be systematically selected and asked permission to interview her husband/male partner.

#### Tanzania

A simple random sample of 30 'streets' (neighbourhoods) will be selected from across the 15 urban and semi-urban wards of Ilmela District. The boundaries of each selected street will be identified and mapped using Global Positioning System (GPS) devices,<sup>20</sup> and within each street, we will randomly select 50 GPS coordinates using ArcGIS software version 9.3 (Esri, Redlands, USA). All households whose front doors are located within a radius of 20 meters around the GPS point will be visited and all eligible consenting girls aged 15-19 years residing in these households invited to be interviewed. We aim to interview 166 girls per street. If after three visits the target sample of girls cannot be reached, an additional GPS point will be sampled. For every 10 sexually active adolescent girls aged 15-19 years interviewed, one will be systematically selected and asked permission to interview her husband/male partner (married girls) or a co-habiting adult (unmarried girls).

### Data collection

The questionnaires will be adapted from various research instruments that have been used and validated in the study countries, including Demographic and Health Surveys<sup>7,17,18</sup> and Family Planning 2020 (FP2020) surveys.<sup>1</sup> They will be developed in English and then translated into the local languages of the study communities. Final modifications will be made to the questionnaires

following an extensive pretesting exercise and after pilot surveys are conducted in communities outside of the selected study sites.

Questionnaires will be administered face-to-face by female interviewers aged between 18 and 26 years. For households with potentially eligible study participants who are not at home we will attempt to revisit up to twice (three visits in total). Data will be collected and recorded electronically in the field via tablets. This allows improved data quality through real time data delivery, built-in logical checks and skip patterns.

### Study outcomes

Our primary outcome, the prevalence of modern contraceptives (mCPR) among 15 to 19 year old girls will be defined as follows:

Number of fecund sexually active 15-19 year old girls reporting use of modern contraceptives at the time of the survey

---

Number of fecund sexually active 15-19 year old girls

Modern contraception: male and female sterilization, contraceptive implants, intrauterine contraceptive devices, injectables, oral contraceptive pill, emergency contraceptive pill, male condom, female condom, Standard Days Method (SDM), Lactational Amenorrhoea Method (LAM), diaphragm, spermicides, foams and jelly.

Sexually active girls: those who report having sexual intercourse in the last 12 months.

Fecund girls: those who have started menstruating, are not pregnant, and do not report that they are infertile.

Secondary outcomes are outlined in Table 3.

Table 3. Primary and secondary outcomes

| Outcome domain  | Indicators                                                                             |
|-----------------|----------------------------------------------------------------------------------------|
| Primary outcome | Prevalence of modern contraceptive use among sexually active girls aged 15 to 19 years |

|                    |                                                                                                                                                                                                                                                                                                                                                                                                                                                                                                                                                                                                                                                                                                                                                                                                                                                                    |
|--------------------|--------------------------------------------------------------------------------------------------------------------------------------------------------------------------------------------------------------------------------------------------------------------------------------------------------------------------------------------------------------------------------------------------------------------------------------------------------------------------------------------------------------------------------------------------------------------------------------------------------------------------------------------------------------------------------------------------------------------------------------------------------------------------------------------------------------------------------------------------------------------|
| Secondary outcomes | <ul style="list-style-type: none"> <li>- Age specific fertility rates</li> <li>- Age at first birth</li> <li>- Unmet need for modern contraception among sexually active girls aged 15 to 19 years</li> <li>- Adolescent girls' knowledge on the use of modern contraceptives to prevent unintended pregnancies</li> <li>- Adolescent girls' agency (self-efficacy) to use modern contraceptives to prevent unintended pregnancies</li> <li>- Adolescent girls' attitudes towards the use of modern contraceptives to prevent unintended pregnancies</li> <li>- Adolescent girls' access to contraceptive services and products</li> <li>- Adolescent girls' misconceptions about modern contraceptives</li> <li>- Community acceptance and social support for adolescent girls to adopt healthy SRH behaviours, including use of modern contraceptives</li> </ul> |
|--------------------|--------------------------------------------------------------------------------------------------------------------------------------------------------------------------------------------------------------------------------------------------------------------------------------------------------------------------------------------------------------------------------------------------------------------------------------------------------------------------------------------------------------------------------------------------------------------------------------------------------------------------------------------------------------------------------------------------------------------------------------------------------------------------------------------------------------------------------------------------------------------|

### Data analysis

In Nigeria, we will estimate the intervention effect separately for Ogun and each LGA-pair in Nasawara. The effect estimates will be obtained by subtracting the baseline mCPR prevalence estimates from the prevalence estimates at follow up and then calculating the difference between the control and intervention LGAs (the difference in difference method). If the two effect estimates for Nasawara are similar then we will combine them (e.g. by weighting by the inverse of the variance) to produce a single summary estimate for the state.

In Ethiopia and Tanzania, the primary analysis will compare the proportion of sexually active girls who report using modern contraception at baseline and endline. We will use logistic regression models to adjust for potential confounders, including age, educational attainment, parity, and marital status. In addition, we will conduct the following secondary analyses:

1. Dose-response: individual level of engagement with the A360 interventions will be measured at endline. We will use a series of questions to rank individuals by their level of engagement with the A360 interventions that are available in the place where they live. We will then use regression models to assess the strength of association between level of engagement with the A360 interventions and use of modern contraception. Our hypothesis will be that those who are more engaged will be more likely to use modern contraception. If the data are consistent with this hypothesis this will provide additional evidence of the effectiveness of the intervention.
2. Secular trends: mCPR data available from other sources for the time period 2015-2019 will be examined to assess whether changes in mCPR in A360 communities between 2017 and 2019 reflect background changes in mCPR or whether mCPR appears to have increased more than would be expected during this time period. Potential sources of data include DHS (Tanzania, Ethiopia), PMA2020 (Ethiopia), and health and demographic surveillance site data (Tanzania, Ethiopia). Specifically, we will undertake a "modified" difference in difference analysis. Prior to analysis of the endline data, from available existing data we will estimate the absolute increase in mCPR rates that we would expect in the study communities if secular trends from other sources were replicated. In the "modified" difference in difference analysis we will subtract this expected change from the difference between endline and baseline mCPR rate.

All analyses will be conducted in Stata 15 and we will use weights and robust standard errors to account for the two-stage cluster sampling design.

### Sample size

The baseline mCPR estimates used in our sample size calculations were based on projections which PSI conducted in September 2015 using available DHS data.<sup>7 16 19 20</sup>

Effect estimates are based on an analysis (unpublished) conducted by one of our evaluation collaborators, Ms. Michelle Weinberger (Avenir Health). She reviewed 25 studies published between 1993 and 2014 which had estimated the impact of family planning interventions on mCPR using a variety of study designs. Ms. Weinberger extracted published odds ratios for effect size when available, or, calculated them using published results. She then calculated the median and maximum odds ratios to give a sense of the average, and, maximum increase in mCPR expected based on the existing evidence base.

#### Nigeria

In Ogun State, among sexually active unmarried girls aged 15 to 19 years, we assumed that between 2017 and 2019 mCPR will increase from 64.4% to 65.6% in the absence of A360, and from 64.4% to 72.6% in the presence of A360. Based on these assumptions and those in Table 4 and 5, 12,000 unmarried girls aged 15-19 years must be surveyed to achieve 90% power.

In Nasarawa State, among sexually active married 15 to 19 year olds, we have assumed that between 2017 and 2019 mCPR will increase from 3.0% to 3.1% in the absence of A360, and from 3.0% to 5.1% in the presence of A360. Thus, 4,600 married girls aged 15-19 years must be surveyed to achieve 90% power (Table 5). In addition, a sample of 250 co-habiting adults (Ogun) and 250 husbands/male partners (Nasarawa) will be interviewed.

#### Ethiopia

In Oromia Region, among sexually active married girls aged 15 to 19 years, we have assumed that between 2017 and 2019 mCPR will increase from 44.0% to 50.8% in the presence of A360. Based on this assumption and those in Table 4, 1,926 married girls aged 15 to 19 must be surveyed to achieve 90% power (Table 5). In addition, a sample of 128 husbands/male partners will be interviewed.

#### Tanzania

In Ilmela District, Tanzania, among sexually active girls aged 15 to 19 years, we have assumed that between 2017 and 2019 mCPR will increase from 26.7% to 32.7% in the presence of A360. Thus, 4,980 girls aged 15 to 19 years (corresponding to 1,217 sexually active girls) must be surveyed to achieve 90% power (Table 5). In addition, a sample of 127 co-habiting adults will be interviewed.

Table 4. Assumptions for key parameters required for sample size calculations

| Parameter                                                                                  | Ogun <sup>1</sup> | Nasarawa <sup>1</sup> | Oromia <sup>2</sup> | Mwanza <sup>3</sup> |
|--------------------------------------------------------------------------------------------|-------------------|-----------------------|---------------------|---------------------|
| Proportion of 15-19 year old females who are married (or living together)                  | 10%               | 15%                   | 20%                 | 22%                 |
| Proportion of 15-19 year old females who are unmarried (not currently married)             | 90%               | 85%                   | 80%                 | 78%                 |
| Proportion of unmarried 15-19 year old females who report sexual activity in the past year | 15%               |                       | -                   | 25%                 |

|                                                                                   |     |     |     |     |
|-----------------------------------------------------------------------------------|-----|-----|-----|-----|
| Proportion of married 15-19 year olds who report sexual activity in the past year | 97% | 97% | 97% | 97% |
| Proportion of sexually active girls who are married                               | 42% |     | -   | 52% |
| Proportion of sexually active girls who are unmarried                             | 58% |     | -   | 48% |
| Proportion of households with resident who is female aged 15-19 years             | 19% | 29% | 27% | 34% |

Sources: 1 (Nigeria DHS 2013,<sup>7</sup> Nigeria GHS 2016<sup>11</sup>); 2 (Ethiopia DHS 2011,<sup>8</sup> Ethiopia Mini DHS 2014,<sup>20</sup> Ethiopia census 2007<sup>12</sup>); 3 (Tanzania DHS 2015-16,<sup>17</sup> Tanzania census 2012<sup>13</sup>)

Table 5. Sample size estimates

| Parameter                                                                                                                          | Ogun   | Nasarawa | Oromia | Mwanza |
|------------------------------------------------------------------------------------------------------------------------------------|--------|----------|--------|--------|
| Target sample of sexually active 15-19 year olds <sup>1</sup>                                                                      | 1,413  | 3,586    | 1,132  | 1,217  |
| Total sample of all 15-19 year olds <sup>1</sup><br>- includes non-sexually active girls<br>- taking into account 10% non-response | 10,362 | 4,067    | 1,284  | 3,314  |
| Design effect                                                                                                                      | 1.16   | 1.12     | 1.50   | 1.50   |
| Sample size for survey <sup>2</sup>                                                                                                | 12,000 | 4,600    | 1,926  | 4,980  |

1 includes unmarried girls (Ogun); married girls (Nasarawa and Ethiopia); unmarried and married girls (Mwanza). 2 total sample of all 15-19 year olds x design effect

### Process evaluation

The specific objectives of the process evaluation (PE) are as follows:

1. To provide analysis and learning to support adaptive management and course correction during implementation
2. To evaluate how the interdisciplinary A360 approach to ASRH programme design plays out in implementation
3. To investigate how the A360 approach and interventions interface with the different contexts in which it is being implemented, including barriers to and enablers of implementation and how A360 leverages, overcomes or addresses them
4. To evaluate the experience of A360 among adolescents and community members and how it affects perceptions and opinions about adolescent use of contraception
5. To investigate how interventions are operationalized and their feasibility for scale-up and replication

PE data collection will take place bi-annually. The PE will visit the outcome evaluation sites in 2018 and again at endline. To generate evidence, the PE will employ a number of primary data collection methods including in-depth interviews (IDIs); focus group discussions (FGDs); participatory youth research (PYR); as well as direct observation of key events, process points, community moments and A360 sites.

- **IDIs** will be conducted with stakeholders within the A360 consortium and at community and service levels. IDIs probe the A360 process and perceptions of this from a range of social actors at these levels. IDIs will employ structured interview guides to enable systematic discussion led by the interviewer covering defined areas.
- **FGDs** are employed at service and community levels with adolescent girls and community members.
- **PYR** works with young people as researchers to collect a rich narrative around how adolescent girls feel about the A360 interventions and changes resulting from A360. This will consider benefits, negative consequences and unintended outcomes that have emerged as a result of participating in A360 activities from the perspectives of adolescent girls.

### **Strengths and limitations**

A strength of our outcome evaluation is the collection of comparable data before and after intervention implementation in four different settings in three countries. In two settings in Nigeria, we will also collect data from populations not exposed to the intervention and hence will have a quasi-experimental design.<sup>21</sup> Triangulation with dose-response and trends analyses, and implementer monitoring and evaluation data will strengthen the inference possible from the study findings. The process evaluation, conducted throughout the two-year implementation period in the outcome evaluation areas, will provide information on the context and mechanism of the intervention, and will complement the outcome data.

In Nigeria, where the intervention will be evaluated through a quasi-experimental design, the validity of the effect estimate depends on the time trend being the same in both intervention and control areas. The largest potential risk for the study design is the risk of selecting comparison areas that are not comparable to the intervention areas. We have tried to mitigate this risk by selecting LGAs with similar key socio-demographic and reproductive health indicators. In addition, our baseline survey will allow us to undertake a more accurate assessment as to how comparable our study sites are on a number of additional key indicators.

In Tanzania and Ethiopia, the study design does not include a comparison group and observed changes in mCPR could be due to secular trends. As described above, we will examine historical and contemporaneous mCPR data from other sources so that our findings can be interpreted in the context of underlying trends. In addition, a dose-response analysis will be conducted at endline to look at the association between individual-level engagement with the A360 intervention and modern contraception use.

Due to resource constraints, we decided to focus on a limited number of geographical areas, which will affect the generalisability of our findings. However, our study is only one component of the overall A360 evaluation. The A360 programme implementers will also be collecting monitoring and evaluation data across all sites, and the process evaluation and a cost effectiveness analysis will be conducted over wider A360 areas. We anticipate incorporating this additional information into the overall evaluation.

It is important to note that this outcome evaluation is not evaluating HCD *per se*, but an intervention designed using HCD. A major challenge in designing the outcome evaluation for A360 was that when

1  
2  
3 the outcome evaluation study protocols and data collection tools were being developed, the A360  
4 project was in the mid-stages of intervention development. If the final intervention package is  
5 significantly different from earlier prototypes then the study protocol and data collection tools for  
6 the baseline study may not be as well tailored to the intervention as if the final package of  
7 interventions was known in advance. If needed, changes to the endline study protocol and data  
8 collection tools will be made to better capture the impact of the final A360 package of interventions.  
9

## 10 11 **ETHICS AND DISSEMINATION**

### 12 **Ethics approval**

13 The protocol was approved by the National Health Research Ethics Committee of Nigeria (Ref:  
14 NHREC/01/01/2007-25/05/2017), National Health Research Ethics Review sub-Committee of  
15 Tanzania (Ref: NIMR/HQ/R.8a/Vol. IX/2549), Oromia Health Bureau Research Ethical Review  
16 Committee (Ref: BEFOIHBTFH/1-8/2844), and the London School of Hygiene and Tropical  
17 Medicine Ethics Committee (Ref: 14145).  
18  
19

### 20 21 **Dissemination of study findings**

22 Our research findings dissemination plan includes peer-reviewed publications, stakeholder  
23 workshops, reports and briefings, social media, and presentations at different forums. In compliance  
24 with the funder's requirements, after a period of 6 to 12 months following the endline survey, the  
25 data will be made available via the LSHTM Data Repository after removing all direct and indirect  
26 identifiers from the data.  
27  
28

29 **ACKNOWLEDGEMENTS:** Ms. Michelle Weinberger (Avenir Health) for providing the effect estimates  
30 for our sample size calculations. Itad as the lead organisation responsible for the overall A360  
31 evaluation. PSI Headquarters, PSI Ethiopia, PSI Tanzania and SFH for their support with site  
32 selection and engagement in conversation regarding the design. Contributions from London School of  
33 Hygiene and Tropical Medicine authors are part of their work for the Centre for Evaluation, which  
34 aims to improve the design and conduct of public health evaluations through the development,  
35 application and dissemination of rigorous methods, and to facilitate the use of robust evidence to  
36 inform policy and practice decisions.  
37  
38

39  
40 **COMPETING INTERESTS:** None declared  
41

42  
43 **FUNDING:** The Bill & Melinda Gates Foundation and the Children's Investment Fund Foundation  
44

45 **CONTRIBUTORS:** CJA, EM, SK, MSN, EEC, MM, CB, JRH and AMD were involved in conception and  
46 study design. CB provided statistical expertise. CJA, EM and AMD were involved in drafting of the  
47 manuscript. SK, MSN, EEC, MM, CB and JRH were involved in critical revision of the manuscript for  
48 important intellectual content. All the authors were involved in final approval of the manuscript and  
49 decision to submit the manuscript for publication.  
50  
51

## 52 **REFERENCES**

- 53  
54 1. Family Planning 2020, Family Planning 2020: accelerating progress, strategy for 2016–2020, 2015  
55 [Available from: <http://www.familyplanning2020.org/microsite/strategy>.  
56  
57  
58  
59

2. Chandra-Mouli V, Parameshwar PS, Parry M, et al. A never-before opportunity to strengthen investment and action on adolescent contraception, and what we must do to make full use of it. *Reprod Health* 2017;14(1):85. doi: 10.1186/s12978-017-0347-9.
3. Jacqueline E. Darroch, Vanessa Woog, Akinrinola Bankole and, et al. Adding It Up: Costs and Benefits of Meeting the Contraceptive Needs of Adolescents. New York: Guttmacher Institute, 2016.
4. World Health Organization. Global Accelerated Action for the Health of Adolescents (AA-HA!): guidance to support country implementation. . Geneva, 2017.
5. Finlay JE, Ozaltin E, Canning D. The association of maternal age with infant mortality, child anthropometric failure, diarrhoea and anaemia for first births: evidence from 55 low- and middle-income countries. *BMJ Open* 2011;1(2):e000226. doi: 10.1136/bmjopen-2011-26.
6. United Nations (UN), Adolescent Fertility Since the International Conference on Population and Development (ICPD) in Cairo. 2013. New York: UN Population Division, Department of Economic and Social Affairs.
7. 2013 Nigeria Demographic and Health Survey [Available from: <http://dhsprogram.com/publications/publication-fr293-dhs-final-reports.cfm>].
8. 2016 Ethiopia Demographic and Health Survey [Available from: <https://dhsprogram.com/publications/publication-FR328-DHS-Final-Reports.cfm>].
9. 2015-16 Tanzania Demographic and Health Survey [Available from: <https://dhsprogram.com/publications/publication-FR321-DHS-Final-Reports.cfm>].
10. Society for Family Health Nigeria [Available from: <http://www.sfhnigeria.org/>].
11. Nigeria General Household Survey 2015-2016 [Available from: <http://microdata.worldbank.org/index.php/catalog/2734/study-description>].
12. Ethiopia - Population and Housing Census of 2007 Central Statistics Agency Addis Ababa [Available from: <http://catalog.ihnsn.org/index.php/catalog/3583>].
13. Tanzania - Population and Housing Census 2012 National Bureau of Statistics Dar es Salaam [Available from: <http://catalog.ihnsn.org/index.php/catalog/4618>].
14. Population Services International. Adolescents 360 [Available from: <http://www.psi.org/special-project/adolescents-360/>].
15. Federal Ministry Of Health Nigeria National Health Management Information System [Available from: <https://dhis2nigeria.org.ng/dhis/dhis-web-commons/security/login.action>].
16. 2011 Ethiopia Demographic and Health Survey [Available from: <https://dhsprogram.com/publications/publication-FR255-DHS-Final-Reports.cfm>].
17. Osotimehin B. Family planning as a critical component of sustainable global development. *Glob Health Action* 2015;8:29978.(doi):10.3402/gha.v8.29978. eCollection 2015.
18. Kavishe B, Biraro S, Baisley K, et al. High prevalence of hypertension and of risk factors for non-communicable diseases (NCDs): a population based cross-sectional survey of NCDs and HIV infection in Northwestern Tanzania and Southern Uganda. *BMC Med* 2015;13:126.(doi):10.1186/s12916-015-0357-9.
19. 2010 Tanzania Demographic and Health Survey [Available from: <https://dhsprogram.com/publications/publication-fr243-dhs-final-reports.cfm>].
20. Ethiopia Mini Demographic and Health Survey 2014 Central Statistics Agency Addis Ababa [Available from: [https://www.unicef.org/ethiopia/Mini\\_DHS\\_2014\\_Final\\_Report.pdf](https://www.unicef.org/ethiopia/Mini_DHS_2014_Final_Report.pdf)].
21. Habicht JP, Victora CG, Vaughan JP. Evaluation designs for adequacy, plausibility and probability of public health programme performance and impact. *Int J Epidemiol* 1999;28(1):10-8.

# BMJ Open

## Evaluating the impact of an intervention to increase uptake of modern contraceptives among adolescent girls (15 to 19 years) in Nigeria, Ethiopia and Tanzania: the Adolescents 360 quasi-experimental study protocol

|                                 |                                                                                                                                                                                                                                                                                                                                                                                                                                                                                                                                                                                                                                                                                                                                                                                        |
|---------------------------------|----------------------------------------------------------------------------------------------------------------------------------------------------------------------------------------------------------------------------------------------------------------------------------------------------------------------------------------------------------------------------------------------------------------------------------------------------------------------------------------------------------------------------------------------------------------------------------------------------------------------------------------------------------------------------------------------------------------------------------------------------------------------------------------|
| Journal:                        | <i>BMJ Open</i>                                                                                                                                                                                                                                                                                                                                                                                                                                                                                                                                                                                                                                                                                                                                                                        |
| Manuscript ID                   | bmjopen-2018-021834.R1                                                                                                                                                                                                                                                                                                                                                                                                                                                                                                                                                                                                                                                                                                                                                                 |
| Article Type:                   | Protocol                                                                                                                                                                                                                                                                                                                                                                                                                                                                                                                                                                                                                                                                                                                                                                               |
| Date Submitted by the Author:   | 05-Apr-2018                                                                                                                                                                                                                                                                                                                                                                                                                                                                                                                                                                                                                                                                                                                                                                            |
| Complete List of Authors:       | Atchison, Christina; London School of Hygiene and Tropical Medicine, MRC Tropical Epidemiology Group<br>Mulhern, Emma; Itad Limited<br>Kapiga, Saidi ; London School of Hygiene and Tropical Medicine, Department of Infectious Disease Epidemiology; Mwanza Intervention Trials Unit<br>Nsanya , Mussa Kelvin ; Mwanza Intervention Trials Unit<br>Crawford, Emily; Binomial Optimus Limited<br>Mussa, Mohammed ; MMA Development Consultancy<br>Bottomley, Christian ; London School of Hygiene and Tropical Medicine, MRC Tropical Epidemiology Group<br>Hargreaves, James; London School of Hygiene and Tropical Medicine, Department of Social and Environmental Health Research<br>Doyle, Aoife; London School of Hygiene and Tropical Medicine, MRC Tropical Epidemiology Group |
| <b>Primary Subject Heading</b>: | Public health                                                                                                                                                                                                                                                                                                                                                                                                                                                                                                                                                                                                                                                                                                                                                                          |
| Secondary Subject Heading:      | Global health, Public health, Sexual health                                                                                                                                                                                                                                                                                                                                                                                                                                                                                                                                                                                                                                                                                                                                            |
| Keywords:                       | Adolescents, Contraception, Evaluation, Reproductive health                                                                                                                                                                                                                                                                                                                                                                                                                                                                                                                                                                                                                                                                                                                            |
|                                 |                                                                                                                                                                                                                                                                                                                                                                                                                                                                                                                                                                                                                                                                                                                                                                                        |

SCHOLARONE™  
Manuscripts

1  
2  
3 **Evaluating the impact of an intervention to increase uptake of modern contraceptives among**  
4 **adolescent girls (15 to 19 years) in Nigeria, Ethiopia and Tanzania: the Adolescents 360 quasi-**  
5 **experimental study protocol**

6 Christina J Atchison<sup>1</sup>, Emma Mulhern<sup>2</sup>, Saidi Kapiga<sup>3,4</sup>, Mussa Kelvin Nsanya<sup>4</sup>, Emily E Crawford<sup>5</sup>,  
7 Mohammed Mussa<sup>6</sup>, Christian Bottomley<sup>1</sup>, James R Hargreaves<sup>7</sup>, Aoife M Doyle<sup>1</sup>  
8  
9

10 1. London School of Hygiene and Tropical Medicine, MRC Tropical Epidemiology Group, London, UK;  
11 2. Itad Limited, Hove, UK; 3. London School of Hygiene and Tropical Medicine, Department of  
12 Infectious Disease Epidemiology, London, UK; 4. Mwanza Intervention Trials Unit, Mwanza,  
13 Tanzania; 5. Binomial Optimus Limited, Abuja, Nigeria; 6. MMA Development Consultancy  
14 Addis Ababa, Ethiopia; 7. London School of Hygiene and Tropical Medicine, Department of Social and  
15 Environmental Health Research, London, UK.  
16  
17

18 **Corresponding Author:**

19 Dr Christina J. Atchison  
20 London School of Hygiene and Tropical Medicine,  
21 MRC Tropical Epidemiology Group,  
22 London, UK  
23 Email: [Christina.Atchison@lshtm.ac.uk](mailto:Christina.Atchison@lshtm.ac.uk)  
24 Tel: +44 (0)207 612 7860  
25  
26  
27  
28  
29  
30

31 **Keywords:** Adolescents, Contraception, Evaluation, Reproductive health  
32  
33  
34  
35  
36  
37  
38  
39  
40  
41  
42  
43  
44  
45  
46  
47  
48  
49  
50  
51  
52  
53  
54  
55  
56  
57  
58  
59  
60

**ABSTRACT**

**Introduction:** Nigeria, Ethiopia and Tanzania have some of the highest teenage pregnancy rates, and lowest rates of modern contraceptive use among adolescents. The trans-disciplinary Adolescents 360 (A360) initiative being rolled out across these three countries uses human-centred design to create context-specific multi-component interventions with the aim of increasing voluntary modern contraceptive use among girls aged 15 to 19 years.

**Methods:** The primary objective of the outcome evaluation is to assess the impact of A360 on the prevalence of voluntary use of modern contraception (mCPR) among sexually active girls aged 15 to 19 years. A360 targets different sub-populations of adolescent girls in the three countries. In Northern Nigeria and Ethiopia, the study population is married girls aged 15 to 19 years. In Southern Nigeria, the study population is unmarried girls aged 15 to 19 years. In Tanzania, both married and unmarried girls aged 15 to 19 years will be included in the study. In all settings, we will use a pre- and post- population-based cross-sectional survey design. In Nigeria, the study design will also include a comparison group. A one-stage sampling design will be used in Nigeria and Ethiopia. A two-stage sampling design will be used in Tanzania. Questionnaires will be administered face-to-face by female interviewers aged between 18 and 26 years. Study outcomes will be assessed before the start of A360 implementation in late 2017 and approximately 24 months after implementation in late 2019.

**Ethics and dissemination:** The study protocol was approved by the National Health Research Ethics Committee of Nigeria, National Health Research Ethics Review sub-Committee of Tanzania, Oromia Health Bureau Research Ethical Review Committee, and the London School of Hygiene and Tropical Medicine Ethics Committee. Findings of this study will be widely disseminated through workshops, conference presentations, reports, briefings, factsheets and academic publications.

**Strengths and limitations of this study**

- This study is part of an independent multi-component impact evaluation of a multi-country adolescent sexual and reproductive health intervention, and we will collect comparable data before and after intervention implementation in four different settings in three countries.
- In Nigeria, the randomisation of intervention allocation was not possible, therefore in this quasi-experimental design conclusions about causality are less definitive than a cluster-randomised design.
- Triangulation with dose-response and trends analyses will strengthen the inference possible from the study findings.
- Due to resource constraints, we focused resources on selected geographical areas, and we acknowledge that this will restrict the generalisability of our findings.
- A process evaluation and a cost-effectiveness study, conducted throughout the two-year implementation period, will provide information on the context and mechanism of the intervention, and will complement the outcome data.

## INTRODUCTION

In 2012, the global community launched the Family Planning 2020 (FP2020) initiative to reach 120 million new contraceptive users in developing countries by 2020.<sup>1</sup> Specifically, it calls for meeting all women's needs for modern contraception to prevent unintended pregnancies and reducing the high adolescent birth rates in the world's poorest countries. Helping adolescent girls avoid unintended pregnancies can have far-reaching benefits for them, their children and societies as a whole.<sup>2</sup> Complications of pregnancy and childbirth are the leading cause of death among girls aged 15 to 19,<sup>3</sup> and babies born to adolescent mothers face greater health risks than those born to older women.<sup>5</sup> Moreover, adolescent childbearing is associated with lower educational attainment, and it can perpetuate a cycle of poverty from one generation to the next.<sup>3</sup>

From 1990 to 2010, adolescent fertility rates declined in most countries.<sup>6</sup> However, adolescent fertility rates remain high in many lower income countries. In some countries, fertility rates are declining more slowly in adolescents than in older women.<sup>1</sup> Nigeria, Ethiopia and Tanzania have amongst the highest rates of adolescent fertility globally; 109, 57 and 118 births per 1,000 girls aged 15 to 19 per year, respectively.<sup>1</sup> Equally, these countries also have some of the lowest rates of use of modern contraception in adolescents. In Nigeria, 98.8% of married adolescent girls and 50.3% of unmarried sexually active adolescent girls do not use a modern contraceptive method.<sup>7</sup> The equivalent figures are 68.2% and 42.5% in Ethiopia;<sup>8</sup> and 86.7% and 66.9% in Tanzania.<sup>9</sup> Preventing pregnancy among adolescents is a global priority and new interventions are needed, particularly in countries like Nigeria, Ethiopia and Tanzania where adolescent fertility rates remain high.

Despite having clear needs, both married and unmarried adolescent girls in many low- and middle-income countries lack access to reliable contraception. In addition, rates of contraceptive failure are higher in adolescents than in older women, with younger women more likely to abandon contraception despite ongoing need.<sup>10</sup> Reasons include poor understanding of pregnancy risks, concerns about the effect of contraceptives on health or fertility and opposition from partners. Lack of knowledge of services, cost, shyness, and community stigma about sexual activity, and disapproving attitudes from providers are further barriers.<sup>10</sup> Adolescent sexual and reproductive health is affected by a country's cultural, religious, legal, political, and economic contexts. In responding, health actions are needed at each level, from structural, through to community settings including schools, and health services.<sup>4,10</sup> The most effective programmes are typically multi-component and target one or more of these settings.<sup>4,10</sup> There are a range of effective and scalable interventions including comprehensive sexuality education, and provision of youth-friendly sexual and reproductive health services. Yet the evidence base for action remains relatively weak.<sup>4,11</sup> The overwhelming majority of intervention studies derive from high-income countries.<sup>11</sup>

Adolescents 360 (A360) is an initiative in the field of adolescent sexual and reproductive health programming, with the intention of being implemented at scale in Nigeria, Ethiopia and Tanzania. The final package of interventions are country-specific and include a combination of community-based sexual and reproductive health education, counselling, and improved contraceptive provision through "adolescent friendly" services. The external evaluation of the A360 intervention comprises of an outcome evaluation, a process evaluation and a cost effectiveness study. We present here the study protocol for the outcome evaluation of A360.

## METHODS AND ANALYSIS

### Study objective

The primary objective of the outcome evaluation is to evaluate the effectiveness of the A360 programme in increasing the uptake of voluntary modern contraception among sexually active girls aged 15 to 19 years.

### Study settings

In Nigeria, A360 is being implemented by the Society for Family Health (SFH)<sup>12</sup> in three states in the north (Federal Capital Territory, Nasarawa, Kaduna), and in seven states in the south (Lagos, Osun, Ogun, Oyo, Edo, Delta and Akwa Ibom) of the country. The A360 programme will be implemented in approximately 60% of the Local Government Areas (LGAs) in each selected state. We will conduct the outcome evaluation in four LGAs in Nasarawa State and two LGAs in Ogun State. Nasarawa State is a state in north central Nigeria with a total population of 1.9 million.<sup>13</sup> Overall, 41.3% of the female household population has no education, and the median age at first marriage for women is 19.7 years.<sup>7</sup> Current use of modern contraception among married women aged 15 to 49 years is 16.3%. Ogun State, in south western Nigeria has a total population of 3.8 million.<sup>13</sup> Overall, 24.1% of the female household population has no education, and the median age at first marriage for women is 20.5 years. Current use of modern contraception among married women aged 15 to 49 years is 21.5%.<sup>7</sup>

In Ethiopia, A360 is being implemented by Population Services International (PSI) in two city administrations and five regional states (Addis Ababa, Amhara, Dire Dawa, Harari, Oromia, Southern Nations, Nationalities and People's Region (SNNP) and Tigray). Within each of the selected regional states, A360 will be implemented in selected woredas (districts), and we will conduct the outcome evaluation study in four woredas in Oromia Region. Oromia Region has a total population of 27 million.<sup>14</sup> Overall, 51.5% of the female household population has no education, and the median age at first marriage for women is 17.4 years. Current use of modern contraception among married women aged 15 to 49 years is 28.1%.<sup>8</sup>

In Tanzania, A360 is being implemented by PSI in ten regions (Kagera, Geita, Mwanza, Arusha, Tabora, Tanga, Dar es Salaam, Mbeya, Iringa, and Morogoro). We will conduct the outcome evaluation in urban and semi-urban wards of Ilelele District, Mwanza Region. Mwanza Region has a total population of 2.8 million.<sup>15</sup> Overall, 24.2% of the female household population has no education, and the median age at first marriage for women is 18.9 years. Current use of modern contraception among married women aged 15 to 49 years is 18.4%.<sup>9</sup>

### Interventions under study

The A360 interventions are being designed using a human centred design process which includes the following steps:<sup>16</sup>

1. Inspiration: a period of formative research to understand adolescent girls sexual and reproductive health needs and their socio-cultural environment.
2. Ideation: an iterative process of generating, testing and refining ideas, and developing and testing prototypes in real-world settings.
3. Implementation: intervention roll out at scale in target regions across the three countries.

Interventions are currently in the final round of prototyping (ideation phase). The most likely final package of interventions in each setting is described in Table 1.

Table 1. The likely final A360 package of interventions in each setting

| A360 Country    | Target population     | Intervention                                                                                                                                                                                                                                                                                                                                                                                                                                                                                                                                                                                                                                                                                                                                                                                                                                                                                                                                                                                                                                                                                                                                                              |
|-----------------|-----------------------|---------------------------------------------------------------------------------------------------------------------------------------------------------------------------------------------------------------------------------------------------------------------------------------------------------------------------------------------------------------------------------------------------------------------------------------------------------------------------------------------------------------------------------------------------------------------------------------------------------------------------------------------------------------------------------------------------------------------------------------------------------------------------------------------------------------------------------------------------------------------------------------------------------------------------------------------------------------------------------------------------------------------------------------------------------------------------------------------------------------------------------------------------------------------------|
| Nigeria (North) | Married girls         | Under design at the time of writing.<br>Due to security issues during the design phase, it was not feasible to develop a context specific programme. A rapid assessment based on insights and prototypes from the other contexts is underway to determine the program to rollout in Northern Nigeria.                                                                                                                                                                                                                                                                                                                                                                                                                                                                                                                                                                                                                                                                                                                                                                                                                                                                     |
| Nigeria (South) | Unmarried girls       | <p><b>“9ja Girls”</b></p> <ul style="list-style-type: none"> <li>- Mobilisation of girls aged 15-19 to attend 9ja Girls events by emphasizing vocational skills and life planning,</li> <li>- Sensitisation sessions in the community with mothers,</li> <li>- Community launches involving key community influencers (e.g. local government, religious leaders)</li> <li>- Physical (e.g. in a public health centre) and digital (e.g. online forums) safe spaces for girls,</li> <li>- Public health centre-based vocational skills classes focusing on job skills and life planning, including opt-out one-to-one counselling sessions with adolescent friendly providers to address fears, dispel myths, and highlight benefits of contraception. Opt out means that girls will be counselled by a service provider unless they decline,</li> <li>- Public health centre-based delivery of family planning products and/or referral to adolescent friendly providers.</li> </ul> <p><b>“9ja Girls”</b> will utilise clusters of public health centres, private social-franchise clinics, and stand-alone clinics in facilities donated by the Ministry of Health.</p> |
| Ethiopia        | Married girls         | <p><b>“Smart Start”</b></p> <ul style="list-style-type: none"> <li>- Community-based financial planning linked to family planning counselling sessions for newly married or soon to be married couples/girls to enable informed choice and decision making,</li> <li>- Delivered in partnership with the national Health Extension Programme via Health Extension Workers and augmented by the existing community infrastructure of the Women’s Development Army and a PSI-recruited <b>“Smart Start”</b> team and local Youth Champions,</li> <li>- Delivery of family planning products through local service providers.</li> </ul>                                                                                                                                                                                                                                                                                                                                                                                                                                                                                                                                     |
| Tanzania        | Unmarried and married | <p><b>“Kuwa Mjanja” (Be Smart)</b></p> <ul style="list-style-type: none"> <li>- Mobilisation of girls aged 15-19 to attend <b>“Kuwa Mjanja”</b> events by emphasising vocational skills, learning about body changes and/or planning for life goals,</li> <li>- Community and clinic-based events for mothers to sensitise them to their daughters’ developmental stages associated with the desire to use contraception to prevent unwanted pregnancy in adolescent girls,</li> <li>- Pop-up and clinic-based events focusing on vocational skills and life planning for girls, including opt-out one-to-one counselling sessions with adolescent friendly providers to address fears, dispel myths, and highlight benefits of contraception. Opt out means that girls will be counselled by a service provider unless</li> </ul>                                                                                                                                                                                                                                                                                                                                        |

|  |  |                                                                                                                                                                                                                                                                                                                                                                                                                                                                                                                                                                              |
|--|--|------------------------------------------------------------------------------------------------------------------------------------------------------------------------------------------------------------------------------------------------------------------------------------------------------------------------------------------------------------------------------------------------------------------------------------------------------------------------------------------------------------------------------------------------------------------------------|
|  |  | <p>they decline,</p> <ul style="list-style-type: none"> <li>- Community and clinic-based delivery of family planning products,</li> <li>- Sustained interaction and engagement through “<i>Kuwa Mjanja</i>” branded clubs and social media forums,</li> <li>- Club based events focusing on vocational skills, learning about their bodies, reproductive health and contraception.</li> </ul> <p>“<i>Kuwa Mjanja</i>” will utilise both public and private social-franchise clinics in partnerships with the Ministry of Health, NGOs and community-based organisations.</p> |
|--|--|------------------------------------------------------------------------------------------------------------------------------------------------------------------------------------------------------------------------------------------------------------------------------------------------------------------------------------------------------------------------------------------------------------------------------------------------------------------------------------------------------------------------------------------------------------------------------|

### Design of outcome evaluation

A summary of the methods used can be found in Table 2. Separate protocols were developed for each country to take into account the country-specific A360 implementation strategies and study designs developed.

#### Nigeria

The intervention will be evaluated in Ogun (South Nigeria) and Nasawara (North Nigeria) through population-based surveys conducted at baseline (late 2017) and approximately 24 months after the start of the intervention. In Nasawara, four LGAs consisting of two similar pairs have been selected for evaluation. Two of these will receive the intervention (one in each pair) and two will not; i.e., they will act as comparisons. In Ogun, the evaluation will be conducted in only two LGAs (one intervention and one comparison).

#### *Study unit inclusion criteria and selection*

Study states were selected by SFH. The selected states were chosen because of the absence of other large-scale adolescent focused sexual and reproductive health activities, and because of SFH’s previous experience working in these states.

Study LGAs were selected by SFH in collaboration with the state Ministry of Health and local government officials. The LGAs were selected from among those where there were no security concerns, and comparison-intervention pairs were selected to be similar with respect to as many as possible of the following criteria:

- Population density
- Estimated modern contraceptive prevalence rate (mCPR) among 15 to 49 year olds (DHIS2, 2016)<sup>17</sup>
- Number of health facilities
- Presence of World Bank support for Maternal and Child Health activities

#### *Allocation to intervention and comparison arms*

Within a pair, allocation of an LGA to the intervention or comparison arm of the outcome evaluation study was done by SFH in collaboration with the state Ministry of Health and local government officials.

#### Ethiopia

1  
2  
3 The intervention will be evaluated through two population-based cross sectional surveys, one  
4 conducted before implementation (late 2017) and another approximately 24 months after the start  
5 of the intervention.  
6

#### 7 *Study unit inclusion criteria and selection*

8 The study region and woredas were selected by PSI. Oromia region was selected because of its  
9 relatively low mCPR as compared to other regions in the Ethiopia Demographic and Health Survey  
10 (DHS) 2011 (24.9%), and its standing as having the highest unmet need for contraception (29.9%) as  
11 compared to other regions.<sup>18</sup> Criteria used by PSI for selecting woredas for inclusion in the study  
12 included:  
13

- 14 • Good infrastructure and accessible all year round
  - 15 • Close proximity to PSI head office in Addis Ababa
  - 16 • Population of married adolescent girls anticipated to be large
- 17  
18

#### 19 Tanzania

20 As in Ethiopia, the intervention will be evaluated through before-and-after population-based surveys  
21 that are scheduled to take place in late 2017 and approximately 24 months after the start of the  
22 intervention.  
23

#### 24 *Study unit inclusion criteria and selection*

25 Mwanza Region was selected by the evaluators in collaboration with PSI because of the high unmet  
26 need for modern contraception among girls aged 15 to 19 years relative to other A360 target  
27 regions,<sup>9</sup> the absence of other large-scale sexual and reproductive health activities, and because PSI  
28 has previous experience working in the region. The study will be restricted to urban and semi-urban  
29 wards in Ilemela District, in part because PSI focuses efforts in more densely populated areas, and in  
30 part because of resource constraints.  
31  
32  
33

#### 34 **Study population**

35 A360 targets different sub-populations of adolescent girls in the three countries (Table 2).  
36  
37

#### 38 Inclusion criteria

39 Adolescent girls aged 15 to 19 years:

- 40 • Unmarried (Tanzania and Southern Nigeria only)
  - 41 • Married or living as married (Ethiopia, Tanzania and Northern Nigeria only)
  - 42 • Living, at the time of the survey, in the study sites
  - 43 • Voluntarily provides informed consent
- 44  
45

#### 46 Exclusion criteria

47 There were no specific exclusion criteria.  
48  
49  
50  
51  
52  
53  
54  
55  
56  
57  
58  
59  
60

Table 2. Summary of methods

| A360 country    | A360 regions                                                                                 | Study design                                                 | Outcome evaluation study setting                                                                                                        | Study population (sample size)                                                       | Sampling strategy                                                                                                                                                                                                                                               |
|-----------------|----------------------------------------------------------------------------------------------|--------------------------------------------------------------|-----------------------------------------------------------------------------------------------------------------------------------------|--------------------------------------------------------------------------------------|-----------------------------------------------------------------------------------------------------------------------------------------------------------------------------------------------------------------------------------------------------------------|
| Nigeria (South) | Lagos, Osun, <b>Ogun</b> , Oyo, Edo, Delta, Akwa Ibom                                        | Cross-sectional before-and-after study with comparison group | Ogun State:<br>- Ado-Odo Ota LGA (intervention)<br>- Shagamu LGA (comparison)                                                           | Unmarried girls aged 15-19 years (12,020)<br><br>Co-habiting adults (250)            | Single stage cluster design<br>PSU: Enumeration Area (EA)<br><br>Simple random sample of EAs (approx. 710 in Ogun). All households (HHs) visited in selected EAs. All eligible individuals to be recruited to participate.                                      |
| Nigeria (North) | Federal Capital Territory, Kaduna, <b>Nasarawa</b>                                           | Cross-sectional before-and-after study with comparison group | Nasarawa State:<br>- Doma LGA (intervention)<br>- Toto LGA (comparison)<br><br>- Karu LGA (intervention)<br>- Nasarawa LGA (comparison) | Married girls aged 15-19 years (4,555)<br><br>Husband (250)                          | Single stage cluster design<br>PSU: Enumeration Area (EA)<br><br>Simple random sample of EAs (approx. 1,150 in Nasarawa). All HHs visited in selected EAs. All eligible individuals to be recruited to participate.                                             |
| Ethiopia        | Addis Ababa, Amhara, Dire Dawa, Harari, <b>Oromia</b> , SNNP, Tigray                         | Cross-sectional before-and-after study                       | Oromia regional state:<br>Wara Jarso, Lome, Ada'a, Fentale woredas                                                                      | Married girls aged 15-19 years (1,926)<br><br>Husband (128)                          | Single stage cluster design<br>PSU: Kebele<br><br>Probability proportional to size sample of 45 kebele. All HHs visited in selected kebele. All eligible individuals to be recruited to participate.                                                            |
| Tanzania        | Kagera, Geita, <b>Mwanza</b> , Arusha, Tabora, Tanga, Dar es Salaam, Mbeya, Iringa, Morogoro | Cross-sectional before-and-after study                       | Mwanza region:<br>Ilemela district (urban and semi-urban wards only)                                                                    | Married and unmarried girls aged 15-19 years (4,980)<br><br>Co-habiting adults (127) | Two stage cluster design<br>PSU: Street<br><br>Simple random sample of 30 streets. Simple random sample of 50 GPS points within each street. All HHs with front door within 20m radius of GPS point visited. All eligible individuals recruited to participate. |

LGA: local government area; PSU: primary sampling unit; EA: Enumerations area; HH: Household.

### Sampling strategy

A one-stage cluster sampling design will be used in Nigeria and Ethiopia. A two-stage cluster sampling design will be used in Tanzania. In each country we will use the smallest available administrative unit as the primary sampling unit (PSU). Specifically, we will use enumeration areas (EAs) from the 2006 census in Nigeria, kebele from the 2007 census in Ethiopia, and streets in Tanzania.

#### Nigeria

The Nigeria Population Commission maintains a database of about 600,000 EAs across the entire country which shows that EAs in Nasarawa have an average of 44 households and EAs in Ogun have an average of 52 households. They advised us that EA population counts are considered unreliable, which creates issues when using proportional to population size sampling techniques. To overcome this issue we will use a simple random sample of EAs. To maximise the efficiency, in terms of logistics, of the study, we will sample clusters of approximately 100 households. Thus, if a selected EA contains fewer than 100 households, then we will randomly sample one of the neighbouring EAs and enumerate all households in that EA. If 100 households is still not enumerated then, a further additional EA will be randomly sampled and enumerated. We estimate that, using this technique, a simple random sample of approximately 710 EAs in Ogun and 1,150 EAs in Nasarawa will need to be selected to reach the target sample size of adolescent girls. All eligible unmarried girls aged 15 to 19 years in the selected households in Ogun and all eligible married girls aged 15 to 19 years in Nasarawa will be recruited to participate in the structured interview. In Nasarawa, in order to reach our target sample size of 250 husbands we estimated that for every 17 sexually active married girls interviewed, one will be systematically selected and asked permission to interview her husband. In Ogun, due to the uncertainty in the proportion of unmarried girls who will report that they are sexually active, we propose that for every 7-14 sexually active unmarried girls surveyed, one will be systematically selected and asked permission to interview a co-habiting adult in order to reach our target sample size of 250 co-habiting adults. The exact sampling interval will be finalised following the pilot study.

#### Ethiopia

A sample of 45 kebeles will be selected from across the four study woredas with probability proportional to population size. Within the selected kebele, we will visit each household and all eligible married girls aged 15 to 19 years will be recruited to participate in the structured interview. In households that have more than one eligible married female aged 15 to 19 years, all consenting married adolescent girls will be interviewed. In order to reach our target sample size of 128 husbands we estimated that for every 15 sexually active married adolescent girls aged 15 to 19 years interviewed, one will be systematically selected and asked permission to interview her husband.

#### Tanzania

A simple random sample of 30 'streets' (neighbourhoods) will be selected from across the 15 urban and semi-urban wards of Ilelele District. The boundaries of each selected street will be identified and mapped using Global Positioning System (GPS) devices,<sup>19</sup> and within each street, we will randomly select 50 GPS coordinates using ArcGIS software version 9.3 (Esri, Redlands, USA).<sup>20</sup> All households whose front doors are located within a radius of 20 meters around the GPS point will be visited and all eligible consenting girls aged 15-19 years residing in these households invited to be interviewed. We aim to interview 166 girls per street. In order to reach our target sample size of 127

co-habiting adults we estimated that for every 10 sexually active adolescent girls aged 15-19 years interviewed, one will be systematically selected and asked permission to interview her husband (married girls) or a co-habiting adult (unmarried girls).

### Data collection

The questionnaires will be adapted from various research instruments that have been used and validated in the study countries, including Demographic and Health Surveys<sup>7-9</sup> and FP2020 surveys.<sup>1</sup> They will be developed in English and then translated into the local languages of the study communities. Final modifications will be made to the questionnaires following an extensive pretesting exercise and after pilot surveys are conducted in communities outside of the selected study sites.

Questionnaires will be administered face-to-face by female interviewers aged between 18 and 26 years. For households with potentially eligible study participants who are not at home we will attempt to revisit up to twice (three visits in total). Data will be collected and recorded electronically in the field via tablets. This allows improved data quality through real time data delivery, built-in logical checks and skip patterns.

### Study outcomes

Our primary outcome, the prevalence of modern contraceptives (mCPR) among 15 to 19 year old girls will be defined as follows:

Number of fecund sexually active 15-19 year old girls reporting use of modern contraceptives at the  
time of the survey

---

Number of fecund sexually active 15-19 year old girls

Modern contraception: male and female sterilization, contraceptive implants, intrauterine contraceptive devices, injectables, oral contraceptive pill, emergency contraceptive pill, male condom, female condom, Standard Days Method, Lactational Amenorrhoea Method, diaphragm, spermicides, foams and jelly.

Sexually active girls: those who report having sexual intercourse in the last 12 months.

Fecund girls: those who have started menstruating, are not pregnant, and do not report that they are infertile.

Secondary outcomes are outlined in Table 3.

Table 3. Primary and secondary outcomes

| Outcome domain  | Indicators                                                                             |
|-----------------|----------------------------------------------------------------------------------------|
| Primary outcome | Prevalence of modern contraceptive use among sexually active girls aged 15 to 19 years |

|                    |                                                                                                                                                                                                                                                                                                                                                                                                                                                                                                                                                                                                                                                                                                                                                                                                                                                                    |
|--------------------|--------------------------------------------------------------------------------------------------------------------------------------------------------------------------------------------------------------------------------------------------------------------------------------------------------------------------------------------------------------------------------------------------------------------------------------------------------------------------------------------------------------------------------------------------------------------------------------------------------------------------------------------------------------------------------------------------------------------------------------------------------------------------------------------------------------------------------------------------------------------|
| Secondary outcomes | <ul style="list-style-type: none"> <li>- Age specific fertility rates</li> <li>- Age at first birth</li> <li>- Unmet need for modern contraception among sexually active girls aged 15 to 19 years</li> <li>- Adolescent girls' knowledge on the use of modern contraceptives to prevent unintended pregnancies</li> <li>- Adolescent girls' agency (self-efficacy) to use modern contraceptives to prevent unintended pregnancies</li> <li>- Adolescent girls' attitudes towards the use of modern contraceptives to prevent unintended pregnancies</li> <li>- Adolescent girls' access to contraceptive services and products</li> <li>- Adolescent girls' misconceptions about modern contraceptives</li> <li>- Community acceptance and social support for adolescent girls to adopt healthy SRH behaviours, including use of modern contraceptives</li> </ul> |
|--------------------|--------------------------------------------------------------------------------------------------------------------------------------------------------------------------------------------------------------------------------------------------------------------------------------------------------------------------------------------------------------------------------------------------------------------------------------------------------------------------------------------------------------------------------------------------------------------------------------------------------------------------------------------------------------------------------------------------------------------------------------------------------------------------------------------------------------------------------------------------------------------|

### Data analysis

In Nigeria, our hypothesis is that sexually active girls aged 15-19 years living in areas where the A360 programme is implemented will have a greater increase in use of modern contraception compared to sexually active girls aged 15-19 years living in areas where the A360 programme has not been implemented. We will estimate the intervention effect separately for Ogun and each LGA-pair in Nasawara. The effect estimates will be obtained by subtracting the baseline mCPR prevalence estimates from the prevalence estimates at follow up and then calculating the difference between the comparison and intervention LGAs (the difference in difference method). If the two effect estimates for Nasawara are similar then we will combine them (e.g. by weighting by the inverse of the variance) to produce a single summary estimate for the state. Similar analyses will be performed to look at the intervention effect on secondary outcomes (Table 3). The difference in differences analysis assumes a common trend in the outcome in both the intervention and comparison area. Even if the two areas differ in a number of characteristics, the analysis is valid provided the common trend assumption is upheld. We will measure potential confounders at baseline and endline, and adjust our analysis for any compositional changes over time in these confounders.

In Ethiopia and Tanzania, our hypothesis is that the prevalence of modern contraceptive use among sexually active girls aged 15-19 years living in areas where the A360 programme is implemented will increase between 2017 and 2019. The increase in mCPR will be greater than what would have been expected to have occurred in the absence of the intervention. The primary analysis will compare the proportion of sexually active girls who report using modern contraception at baseline and endline. Similar analyses will be performed to look at the intervention effect on secondary outcomes (Table 3). We will use logistic regression models to adjust for potential confounders, including age, educational attainment, parity, and marital status (Tanzania only). In addition, we will conduct the following secondary analyses:

1. Dose-response: individual level of engagement with the A360 interventions will be measured at endline. We will use a series of questions to rank individuals by their level of engagement with the A360 interventions that are available in the place where they live. We will then use regression models to assess the strength of association between level of engagement with the A360 interventions and use of modern contraception. Our hypothesis will be that those who are more engaged will be more likely to use modern contraception. If the data are consistent with

1  
2  
3 this hypothesis this will provide additional evidence of the effectiveness of the intervention. Our  
4 analysis approach will try to capture exposure to the main components of the intervention and  
5 to capture overall exposure to the package of interventions. For example, if there are two main  
6 components of the intervention (A, B) then we may have three different exposure variables (A, B  
7 and a combination of A and B). There remains some uncertainty as to which intervention  
8 components will be implemented in each setting over the two year follow-up. A detailed analysis  
9 plan will be finalised prior to the endline data collection.

- 10  
11 2. Secular trends: mCPR data available from other sources for the time period 2015-2019 will be  
12 examined to assess whether changes in mCPR in A360 communities between 2017 and 2019  
13 reflect background changes in mCPR or whether mCPR appears to have increased more than  
14 would be expected during this time period. Detailed contraceptive use data among adolescents  
15 do not exist for the specific geographical areas in our study. Potential sources of data include  
16 DHS (Tanzania, Ethiopia),<sup>8,9</sup> PMA2020 (Ethiopia),<sup>21</sup> and demographic surveillance site data from  
17 areas near to our study sites (Kisesa in Mwanza;<sup>22</sup> Kersa and Harar in Oromia<sup>23</sup>). These data are  
18 unlikely to be directly comparable but we believe that they will give a broad indication as to  
19 whether mCPR is increasing, static or decreasing in the regions our study are situated in.  
20 Specifically, we will undertake a “modified” difference in difference analysis. Prior to analysis of  
21 the endline data, from available existing data we will estimate the absolute increase in mCPR  
22 rates that we would expect in the study communities if secular trends from other sources were  
23 replicated. In the “modified” difference in difference analysis we will subtract this expected  
24 change from the difference between endline and baseline mCPR rate. When presenting this  
25 “modified” difference in difference analysis, we will also present our assessment of the likely  
26 comparability, accuracy and completeness of these alternative data sources.  
27  
28  
29  
30

31 All analyses will be conducted in Stata 15 and we will use weights and robust standard errors to  
32 account for the two-stage cluster sampling design.  
33  
34

### 35 **Sample size**

36 The baseline mCPR estimates and projected trends used in our sample size calculations were based  
37 on analysis which PSI conducted in September 2015 using available DHS data and our own review of  
38 historical DHS and PMA2020 data.<sup>7 18 24 25</sup>  
39  
40

41 Effect estimates are based on an analysis (unpublished) conducted by one of our evaluation  
42 collaborators, Ms. Michelle Weinberger (Avenir Health). She reviewed 25 studies published between  
43 1993 and 2014 which had estimated the impact of family planning interventions on mCPR using a  
44 variety of study designs.<sup>26-44</sup> Ms. Weinberger extracted published odds ratios for effect size when  
45 available, or, calculated them using published results. She then calculated the median and  
46 maximum odds ratios to give a sense of the average, and, maximum increase in mCPR expected  
47 based on the existing evidence base.  
48  
49

### 50 **Nigeria**

51 In Ogun State, among sexually active unmarried girls aged 15 to 19 years, we assumed that between  
52 2017 and 2019 mCPR will increase from 64.4% to 65.6% in the absence of A360, and from 64.4% to  
53 72.6% in the presence of A360. Based on these assumptions and those in Table 4 and 5, our target  
54 sample size is 12,020 unmarried girls aged 15-19 years.  
55  
56  
57  
58  
59  
60

In Nasarawa State, among sexually active married 15 to 19 year olds, we have assumed that between 2017 and 2019 mCPR will increase from 3.0% to 3.1% in the absence of A360, and from 3.0% to 5.1% in the presence of A360. Thus, 4,555 married girls aged 15-19 years must be surveyed to achieve 90% power (Table 5).

In addition, a sample of 250 co-habiting adults (Ogun) and 250 husbands/male partners (Nasarawa) will be interviewed.

#### Ethiopia

In Oromia Region, among sexually active married girls aged 15 to 19 years, we have assumed that between 2017 and 2019 mCPR will increase from 44.0% to 50.8% in the presence of A360. Based on this assumption and those in Table 4, 1,926 married girls aged 15 to 19 must be surveyed to achieve 90% power (Table 5). In addition, a sample of 128 husbands/male partners will be interviewed.

#### Tanzania

In Ilemela District, Tanzania, among sexually active girls aged 15 to 19 years, we have assumed that between 2017 and 2019 mCPR will increase from 26.7% to 32.7% in the presence of A360. Thus, 4,980 girls aged 15 to 19 years (corresponding to 1,217 sexually active girls) must be surveyed to achieve 90% power (Table 5). In addition, a sample of 127 co-habiting adults will be interviewed.

Table 4. Assumptions for key parameters required for sample size calculations

| Parameter                                                                                  | Ogun <sup>1</sup> | Nasarawa <sup>1</sup> | Oromia <sup>2</sup> | Mwanza <sup>3</sup> |
|--------------------------------------------------------------------------------------------|-------------------|-----------------------|---------------------|---------------------|
| Proportion of 15-19 year old females who are married (or living together)                  | 10%               | 15%                   | 20%                 | 22%                 |
| Proportion of 15-19 year old females who are unmarried (not currently married)             | 90%               | 85%                   | 80%                 | 78%                 |
| Proportion of unmarried 15-19 year old females who report sexual activity in the past year | 15%               |                       | -                   | 25%                 |
| Proportion of married 15-19 year olds who report sexual activity in the past year          | 97%               | 97%                   | 97%                 | 97%                 |
| Proportion of sexually active girls who are married                                        | 42%               |                       | -                   | 52%                 |
| Proportion of sexually active girls who are unmarried                                      | 58%               |                       | -                   | 48%                 |
| Proportion of households with resident who is female aged 15-19 years                      | 19%               | 29%                   | 27%                 | 34%                 |

Sources: 1 (Nigeria DHS 2013,<sup>7</sup> Nigeria GHS 2016<sup>13</sup>); 2 (Ethiopia DHS 2011,<sup>18</sup> Ethiopia Mini DHS 2014,<sup>24</sup> Ethiopia census 2007<sup>14</sup>); 3 (Tanzania DHS 2015-16,<sup>9</sup> Tanzania census 2012<sup>15</sup>)

Table 5. Sample size estimates

| Parameter                                                                                                                          | Ogun   | Nasarawa | Oromia | Mwanza |
|------------------------------------------------------------------------------------------------------------------------------------|--------|----------|--------|--------|
| Target sample of sexually active 15-19 year olds <sup>1</sup>                                                                      | 1,413  | 3,586    | 1,132  | 1,217  |
| Total sample of all 15-19 year olds <sup>1</sup><br>- includes non-sexually active girls<br>- taking into account 10% non-response | 10,362 | 4,067    | 1,284  | 3,314  |
| Design effect                                                                                                                      | 1.16   | 1.12     | 1.50   | 1.50   |
| Sample size for survey <sup>2</sup>                                                                                                | 12,020 | 4,555    | 1,926  | 4,980  |

1 includes unmarried girls (Ogun); married girls (Nasarawa and Ethiopia); unmarried and married girls (Mwanza). 2 total sample of all 15-19 year olds x design effect

1  
2  
3 Based on discussions between the A360 funders, implementers and ourselves as independent  
4 evaluators of the programme, it was felt to be important to have an evaluation which was powered  
5 to detect small increases in mCPR in the study settings. These small effect sizes would be important  
6 in terms of the number of users of contraception gained and potential unplanned pregnancies  
7 averted among adolescent girls given the large scale of roll out of A360 across the three countries. In  
8 addition, it was felt that realistically, over only two years, achievable effect sizes were likely to be  
9 small but if detected might provide some reassurance that in the longer term we could expect  
10 greater increases.  
11  
12

13  
14 Further details of the sample size calculations for the study, including sources of data used for  
15 assumptions, are available in the online accompanying supplementary file .  
16

### 17 **Patient and public involvement**

18 There was no patient or public involvement in the design of this study. However, the intervention  
19 was designed using a human centred design process which includes an iterative process of  
20 generating, testing and refining ideas, and developing and testing prototypes with individuals from  
21 the target population through a series of structured workshops.<sup>16</sup>  
22  
23

### 24 **Strengths and limitations**

25 A strength of our outcome evaluation is the collection of comparable data before and after  
26 intervention implementation in four different settings in three countries. In two settings in Nigeria,  
27 we will also collect data from populations not exposed to the intervention and hence will have a  
28 quasi-experimental design.<sup>45</sup> Triangulation with dose-response and trends analyses, and  
29 implementer monitoring and evaluation data will strengthen the inference possible from the study  
30 findings. A process evaluation, conducted throughout the two-year implementation period in the  
31 outcome evaluation areas, will provide information on the context and mechanism of the  
32 intervention, and will complement the outcome data.  
33  
34  
35

36  
37 In Nigeria, where the intervention will be evaluated through a quasi-experimental design, the  
38 validity of the effect estimate depends on the time trend being the same in both intervention and  
39 comparison areas. The common trend assumption is untestable because we will not know what the  
40 trend in the intervention area would have been in the absence of the intervention. We have tried to  
41 select LGAs with similar key socio-demographic and reproductive health indicators as trends in mCPR  
42 are likely to be influenced by the characteristics of the population. In addition, our baseline survey  
43 will allow us to undertake a more accurate assessment as to how comparable our study sites are on  
44 a number of additional key indicators and we will be able to adjust for imbalances in potential  
45 confounders at the analysis stage.  
46  
47

48  
49 In Tanzania and Ethiopia, the study design does not include a comparison group and observed  
50 changes in mCPR could be due to secular trends or other influences. As described above, we will  
51 examine historical and contemporaneous mCPR data from other sources so that our findings can be  
52 interpreted in the context of underlying trends. In addition, a dose-response analysis will be  
53 conducted at endline to look at the association between individual-level engagement with the A360  
54 intervention and modern contraception use.  
55  
56  
57  
58  
59  
60

1  
2  
3 Due to resource constraints, we decided to focus on a limited number of geographical areas, which  
4 will affect the generalisability of our findings. However, our study is only one component of the  
5 overall A360 evaluation. The A360 programme implementers will also be collecting monitoring and  
6 evaluation data across all sites, and the process evaluation and a cost effectiveness analysis will be  
7 conducted over wider A360 areas. We anticipate incorporating this additional information into the  
8 overall evaluation.  
9

10  
11 It is important to note that this outcome evaluation is not evaluating human centred design *per se*,  
12 but an intervention designed using human centred design. A major challenge in designing the  
13 outcome evaluation for A360 was that when the outcome evaluation study protocols and data  
14 collection tools were being developed, the A360 project was in the mid-stages of intervention  
15 development. If the final intervention package is significantly different from earlier prototypes then  
16 the study protocol and data collection tools for the baseline study may not be as well tailored to the  
17 intervention as if the final package of interventions was known in advance. If needed, changes to the  
18 endline study protocol and data collection tools will be made to better capture the impact of the  
19 final A360 package of interventions.  
20  
21

## 22 23 **ETHICS AND DISSEMINATION**

### 24 **Ethics approval**

25 The protocol was approved by the National Health Research Ethics Committee of Nigeria (Ref:  
26 NHREC/01/01/2007-25/05/2017), National Health Research Ethics Review sub-Committee of  
27 Tanzania (Ref: NIMR/HQ/R.8a/Vol. IX/2549), Oromia Health Bureau Research Ethical Review  
28 Committee (Ref: BEFOIHBTFH/1-8/2844), and the London School of Hygiene and Tropical  
29 Medicine Ethics Committee (Ref: 14145).  
30  
31

### 32 33 **Informed consent**

34 Informed consent will be obtained from all study participants and the consent process will be  
35 documented. Written informed consent will be obtained from all participant in Tanzania. In Nigeria  
36 and Ethiopia, only verbal consent will be obtained as a waiver of written consent was granted  
37 because national surveys obtaining verbal responses to a questionnaire, and involving similar  
38 sensitive questions on reproductive health issues are carried out using only verbal consent in these  
39 settings. In Nigeria, parental consent and adolescent girl assent is required for unmarried girls aged  
40 15 to 17 years. In Tanzania, parental consent waiver was granted for this age group because of the  
41 sensitive nature of the topics discussed. Married adolescent girls under 18 years of age are  
42 considered emancipated in all three countries and do not require parental consent in addition to  
43 their own voluntary consent. Study participants will be informed of all risks and protections and will  
44 be able to withdraw from the study at any time for any reason.  
45  
46  
47  
48

### 49 **Benefits and risks**

50 There are no direct individual benefits for taking part in the study. Potential risks to participants are  
51 minimal. The most significant risk identified is a breach of confidentiality. There will be no  
52 identification of the respondent on the survey questionnaire. All study staff will be trained to ensure  
53 that they will protect the privacy and confidentiality of participants to the fullest extent possible.  
54 Interviews will be held at the household of the respondents out of hearing range of others. All  
55 data will be entered directly into tablets and sent to private secure servers on a daily basis through  
56  
57  
58  
59  
60

1  
2  
3 a private and secure internet connection. Data security will include data storage encryption and  
4 controlled password protected access for authorised users only. Data will be kept anonymised  
5 during the study and will be kept strictly confidential in storage for 10 years after completion of the  
6 study. All data based on this research will be reported in aggregate form. Participants will not be  
7 identified by name in any report or publication resulting from the study data.  
8  
9

### 10 **Compensation**

11 There are no costs for being in the study. Therefore, participants will not receive compensation for  
12 taking part.  
13

### 14 **Dissemination of study findings**

15 Our research findings dissemination plan includes peer-reviewed publications, stakeholder  
16 workshops, reports and briefings, social media, and presentations at different forums. In compliance  
17 with the funder's requirements, after a period of 6 to 12 months following the endline survey, the  
18 data will be made available via the London School of Hygiene and Tropical Medicine Data Repository  
19 after removing all direct and indirect identifiers from the data.  
20  
21  
22

23 **ACKNOWLEDGEMENTS:** Ms. Michelle Weinberger (Avenir Health) for providing the effect estimates  
24 for our sample size calculations. Itad as the lead organisation responsible for the overall A360  
25 evaluation. PSI Headquarters, PSI Ethiopia, PSI Tanzania and SFH for their support with site  
26 selection and engagement in conversation regarding the design. Contributions from London School of  
27 Hygiene and Tropical Medicine authors are part of their work for the Centre for Evaluation, which  
28 aims to improve the design and conduct of public health evaluations through the development,  
29 application and dissemination of rigorous methods, and to facilitate the use of robust evidence to  
30 inform policy and practice decisions.  
31  
32  
33

34 **COMPETING INTERESTS:** None declared  
35

36 **FUNDING:** The Bill & Melinda Gates Foundation and the Children's Investment Fund Foundation  
37

38 **CONTRIBUTORS:** CJA, EM, SK, MSN, EEC, MM, CB, JRH and AMD were involved in conception and  
39 study design. CB provided statistical expertise. CJA, EM and AMD were involved in drafting of the  
40 manuscript. SK, MKN, EEC, MM, CB and JRH were involved in critical revision of the manuscript for  
41 important intellectual content. All the authors were involved in final approval of the manuscript and  
42 decision to submit the manuscript for publication.  
43  
44  
45

### 46 **REFERENCES**

- 47 1. Family Planning 2020, Family Planning 2020: accelerating progress, strategy for 2016–2020, 2015  
48 [Available from: <http://www.familyplanning2020.org/microsite/strategy>.
- 49 2. Chandra-Mouli V, Parameshwar PS, Parry M, et al. A never-before opportunity to strengthen  
50 investment and action on adolescent contraception, and what we must do to make full use  
51 of it. *Reprod Health* 2017;14(1):85. doi: 10.1186/s12978-017-0347-9.
- 52 3. Jacqueline E. Darroch, Vanessa Woog, Akinrinola Bankoleand, et al. Adding It Up: Costs and  
53 Benefits of Meeting the Contraceptive Needs of Adolescents. New York: Guttmacher  
54 Institute, 2016.  
55  
56  
57  
58  
59  
60

- 1
- 2
- 3 4. World Health Organization. Global Accelerated Action for the Health of Adolescents (AA-HA!):  
4 guidance to support country implementation. . Geneva, 2017.
- 5 5. Finlay JE, Ozaltin E, Canning D. The association of maternal age with infant mortality, child  
6 anthropometric failure, diarrhoea and anaemia for first births: evidence from 55 low- and  
7 middle-income countries. *BMJ Open* 2011;1(2):e000226. doi: 10.1136/bmjopen-2011-26.
- 8 6. United Nations (UN), Adolescent Fertility Since the International Conference on Population and  
9 Development (ICPD) in Cairo. 2013. New York: UN Population Division, Department of  
10 Economic and Social Affairs.
- 11 7. 2013 Nigeria Demographic and Health Survey [Available from:  
12 <http://dhsprogram.com/publications/publication-fr293-dhs-final-reports.cfm>.
- 13 8. 2016 Ethiopia Demographic and Health Survey [Available from:  
14 <https://dhsprogram.com/publications/publication-FR328-DHS-Final-Reports.cfm>.
- 15 9. 2015-16 Tanzania Demographic and Health Survey [Available from:  
16 <https://dhsprogram.com/publications/publication-FR321-DHS-Final-Reports.cfm>.
- 17 10. Patton GC, Sawyer SM, Santelli JS, et al. Our future: a Lancet commission on adolescent health  
18 and wellbeing. *Lancet* 2016;387(10036):2423-78. doi: 10.1016/S0140-6736(16)00579-1.  
19 Epub 2016 May 9.
- 20 11. Patton GC, Sawyer SM, Ross DA, et al. From Advocacy to Action in Global Adolescent Health. *J*  
21 *Adolesc Health* 2016;59(4):375-7. doi: 10.1016/j.jadohealth.2016.08.002.
- 22 12. Society for Family Health Nigeria [Available from: <http://www.sfhnigeria.org/>.
- 23 13. Nigeria General Household Survey 2015-2016 [Available from:  
24 <http://microdata.worldbank.org/index.php/catalog/2734/study-description>.
- 25 14. Ethiopia - Population and Housing Census of 2007 Central Statistics Agency Addis Ababa  
26 [Available from: <http://catalog.ihns.org/index.php/catalog/3583>.
- 27 15. Tanzania - Population and Housing Census 2012 National Bureau of Statistics Dar es Salaam  
28 [Available from: <http://catalog.ihns.org/index.php/catalog/4618>.
- 29 16. Population Services International. Adolescents 360 [Available from:  
30 <http://www.psi.org/special-project/adolescents-360/>.
- 31 17. Federal Ministry Of Health Nigeria National Health Management Information System [Available  
32 from: <https://dhis2nigeria.org.ng/dhis/dhis-web-commons/security/login.action>.
- 33 18. 2011 Ethiopia Demographic and Health Survey [Available from:  
34 <https://dhsprogram.com/publications/publication-FR255-DHS-Final-Reports.cfm>.
- 35 19. GPS: The Global Positioning System [Available from: <http://www.gps.gov/>.
- 36 20. Kavishe B, Biraro S, Baisley K, et al. High prevalence of hypertension and of risk factors for non-  
37 communicable diseases (NCDs): a population based cross-sectional survey of NCDs and HIV  
38 infection in Northwestern Tanzania and Southern Uganda. *BMC Med*  
39 2015;13:126.(doi):10.1186/s12916-015-0357-9.
- 40 21. Zimmerman L, Olson H, Tsui A, et al. PMA2020: Rapid Turn-Around Survey Data to Monitor  
41 Family Planning Service and Practice in Ten Countries. *Stud Fam Plann* 2017;48(3):293-303.  
42 doi: 10.1111/sifp.12031. Epub 2017 Aug 28.
- 43 22. Kishamawe C, Isingo R, Mtenga B, et al. Health & Demographic Surveillance System Profile: The  
44 Magu Health and Demographic Surveillance System (Magu HDSS). *Int J Epidemiol*  
45 2015;44(6):1851-61. doi: 10.093/ije/dyv188. Epub 2015 Sep 24.
- 46 23. Musa A, Assefa N, Weldegebreal F, et al. Factor associated with experience of modern  
47 contraceptive use before pregnancy among women who gave birth in Kersa HDSS, Ethiopia.  
48 *BMC Public Health* 2016;16:614.(doi):10.1186/s12889-016-3292-6.
- 49 24. Ethiopia Mini Demographic and Health Survey 2014 Central Statistics Agency Addis Ababa  
50 [Available from: [https://www.unicef.org/ethiopia/Mini\\_DHS\\_2014\\_Final\\_Report.pdf](https://www.unicef.org/ethiopia/Mini_DHS_2014_Final_Report.pdf).
- 51 25. 2010 Tanzania Demographic and Health Survey [Available from:  
52 <https://dhsprogram.com/publications/publication-fr243-dhs-final-reports.cfm>.
- 53
- 54
- 55
- 56
- 57
- 58
- 59
- 60

- 1
- 2
- 3 26. Santhya K, Haberland N, Das A, et al. Empowering married young women and improving their
- 4 sexual and reproductive health: Effects of the First-time Parents Project. New Delhi:
- 5 Population Council, 2008.
- 6 27. Speizer IS, Tamashe BO, Tegang SP. An evaluation of the "Entre Nous Jeunes" peer-educator
- 7 program for adolescents in Cameroon. *Stud Fam Plann* 2001;32(4):339-51.
- 8 28. Undie C, Birungi H, Obare F, et al. Expanding access to comprehensive reproductive health and
- 9 HIV information and services for married adolescent girls in Nyanza Province. Nairobi, Kenya:
- 10 Population Council, 2012.
- 11 29. Vernon R, Dura M. Improving the Reproductive Health of Youth In Mexico: Population Council,
- 12 2004.
- 13 30. Villarruel AM, Zhou Y, Gallegos EC, et al. Examining long-term effects of Cuidate-a sexual risk
- 14 reduction program in Mexican youth. *Rev Panam Salud Publica* 2010;27(5):345-51.
- 15 31. Williams T, Mullen S, Karim A, et al. Evaluation of the African Youth Alliance Program in Ghana,
- 16 Tanzania, and Uganda: Impact on Sexual and Reproductive Health Behavior among Young
- 17 People: John Snow, Inc. (JSI), 2007.
- 18 32. Peer Education as a Strategy to Increase Contraceptive Prevalence and Reduce the Rate of
- 19 STIs/HIV among Adolescents in Cameroon. Yaoundé, Cameroon: Institut de Recherche et des
- 20 Etudes des Comportements (IRESCO), 2002.
- 21 33. Agha S. A Quasi-Experimental Study to Assess the Impact of Four Adolescent Sexual Health
- 22 Interventions in Sub-Saharan Africa. *International Family Planning Perspectives*
- 23 2002;28(2):67-70 & 113-18.
- 24 34. Aninanya GA, Debpuur CY, Awine T, et al. Effects of an adolescent sexual and reproductive health
- 25 intervention on health service usage by young people in northern Ghana: a community-
- 26 randomised trial. *PLoS One* 2015;10(4):e0125267. doi: 10.1371/journal.pone.0125267. eCollection
- 27 2015.
- 28 35. Askew I, Chege J, Njue C, et al. A Multi-Sectoral Approach to Providing Reproductive Health
- 29 Information and Services to Young People in Western Kenya: Population Council, 2004.
- 30 36. Brieger WR, Delano GE, Lane CG, et al. West African Youth Initiative: outcome of a reproductive
- 31 health education program. *J Adolesc Health* 2001;29(6):436-46.
- 32 37. Daniel EE, Masilamani R, Rahman M. The effect of community-based reproductive health
- 33 communication interventions on contraceptive use among young married couples in Bihar,
- 34 India. *Int Fam Plan Perspect* 2008;34(4):189-97. doi: 10.1363/ifpp.34.189.08.
- 35 38. Eggleston E, Jackson J, Rountree W, et al. Evaluation of a sexuality education program for young
- 36 adolescents in Jamaica. *Rev Panam Salud Publica* 2000;7(2):102-12.
- 37 39. Erulkar A, Tamrat T. Evaluation of a reproductive health program to support married adolescent
- 38 girls in rural Ethiopia. *Afr J Reprod Health* 2014;18(2):68-76.
- 39 40. Kane TT, De Buyscher R, Taylor-Thomas T, et al. Sexual activity, family life education, and
- 40 contraceptive practice among young adults in Banjul, The Gambia. *Stud Fam Plann*
- 41 1993;24(1):50-61.
- 42 41. Kanesathasan A, Cardinal L, Pearson E, et al. Catalyzing change: improving youth sexual and
- 43 reproductive health through DISHA, an integrated program in India: International Center for
- 44 Research on Women, 2008.
- 45 42. Karim AM, Williams T, Patykewich L, et al. The impact of the African Youth Alliance program on
- 46 the sexual behavior of young people in Uganda. *Stud Fam Plann* 2009;40(4):289-306.
- 47 43. Kim Y, Kols A, Nyakauru R, et al. Promoting sexual responsibility among young people in
- 48 Zimbabwe. *International Family Planning Perspectives* 2001;27(1):11-19.
- 49 44. Levitt-Dayal M, Motihar R. Adolescent Girls in India Choose a Better Future: An Impact
- 50 Assessment: The Centre for Development and Population Activities (CEDPA), 2001.
- 51 45. Habicht JP, Victora CG, Vaughan JP. Evaluation designs for adequacy, plausibility and probability
- 52 of public health programme performance and impact. *Int J Epidemiol* 1999;28(1):10-8.
- 53
- 54
- 55
- 56
- 57
- 58
- 59

### A360 protocol- Further details on sample size calculations

**Table S1: Baseline estimates of mCPR**

| Setting  | Population                                | mCPR among 15-19 year olds in the most recent DHS available when planning study <sup>1</sup> | PSI estimated mCPR in 2015 <sup>2</sup> | PSI projections of annual temporal trend <sup>2</sup> | PSI estimated mCPR in 2017 <sup>2</sup> | Study protocol estimated mCPR in 2017 <sup>3</sup> |
|----------|-------------------------------------------|----------------------------------------------------------------------------------------------|-----------------------------------------|-------------------------------------------------------|-----------------------------------------|----------------------------------------------------|
| Ethiopia | Married 15-19 year olds                   | 39.6%                                                                                        | 39.6%                                   | 2.2%                                                  | 44.0%                                   | 44.0%                                              |
| Nigeria  | Married 15-19 year olds                   | 1.2%                                                                                         | 1.2%                                    | 0.3%                                                  | 1.8%                                    | 3.0%                                               |
|          | Unmarried Sexually active 15-19 year olds | 49.7%                                                                                        | 53.0%                                   | 2.0%                                                  | 57.0%                                   | 64.4%                                              |
| Tanzania | Married 15-19 year olds                   | 12.0%                                                                                        | 15.0%                                   | 0.6%                                                  | 16.2%                                   | 16.2%                                              |
|          | Unmarried Sexually active 15-19 year olds | 34.5%                                                                                        | 37.5%                                   | 0.5%                                                  | 38.5%                                   | 38.5%                                              |

<sup>1</sup>Ethiopia mini DHS 2014; Nigeria DHS 2013; Tanzania DHS 2010

<sup>2</sup>PSI projections of mCPR in the absence of intervention (source: PSI internal document 'A360 New User Estimates\_24 Feb 2016.xls').

<sup>3</sup>mCPR baseline estimates for this study were in line with PSI estimates except for in Nigeria where we estimated a higher baseline mCPR as the mCPR among married women 15-49 years in our study states Nasarawa (16.3%) and Ogun (21.5%) were higher than the national mCPR (9.8%) (DHS 2013, Table 7.4).

Table S2: Estimates of impact

|                             | Population                               | mCPR in 2017 <sup>1</sup> |            | Temporal trend (per year) <sup>2</sup> | Intervention impact (per year) <sup>3</sup> | mCPR in 2019 <sup>1</sup> |            | Minimum measurable effect (% increase over 2 years in A360 areas) | % point increase over 2 years in A360 areas |
|-----------------------------|------------------------------------------|---------------------------|------------|----------------------------------------|---------------------------------------------|---------------------------|------------|-------------------------------------------------------------------|---------------------------------------------|
|                             |                                          | non-A360 areas            | A360 areas |                                        |                                             | Non-A360 areas            | A360 areas |                                                                   |                                             |
| <b>Ethiopia</b>             | <b>Married</b>                           | 44.0%                     | 44.0%      | 1.5%                                   | 1.9%                                        | 47.0%                     | 50.8%      | 15%                                                               | 6.8%                                        |
| <b>Nigeria</b>              | <b>Married</b>                           | 3.0%                      | 3.0%       | 0.05%                                  | 1.0%                                        | 3.1%                      | 5.1%       | 70%                                                               | 2.1%, DID 2.0%                              |
|                             | <b>Unmarried Sexually active</b>         | 64.4%                     | 64.4%      | 0.6%                                   | 3.5%                                        | 65.6%                     | 72.6%      | 13%                                                               | 8.2%, DID 7.0%                              |
| <b>Tanzania<sup>4</sup></b> | <b>Married</b>                           | 16.2%                     | 16.2%      | 0.94%                                  | 1.8%                                        | 18.1%                     | 21.7%      | 34%                                                               | 5.5%                                        |
|                             | <b>Unmarried Sexually active</b>         | 38.5%                     | 38.5%      | 1.22%                                  | 2.0%                                        | 40.9%                     | 44.9%      | 17%                                                               | 6.4%                                        |
|                             | <b>Total sexually active<sup>3</sup></b> | 26.7%                     | 26.7%      | 1.1%                                   | 1.9%                                        | 28.9%                     | 32.7%      | 22%                                                               | 5.9%                                        |

<sup>1</sup> Based on PSI projections (Table S1)

<sup>2</sup> The estimated annual increase in mCPR in the absence of A360 (temporal trend) was estimated using historical DHS and PMA2020 data

<sup>3</sup> Projected study effect sizes were informed by a review of previous evaluations of interventions to increase the use of modern contraceptives that was conducted by Michelle Weinberger. Her review revealed that the median OR in reviewed studies was 1.36 and that the annual increases in mCPR from pre-post studies ranged from 1.3% to 8.5%. We estimated that A360 would result in a median ~1-2% annual increase in mCPR for married girls and a median ~2% annual increase in mCPR for unmarried girls. Among unmarried girls in Nigeria (Ogun State), we predicted a 3.5% annual increase in mCPR.

<sup>4</sup> In Tanzania, estimates and assumptions were made for married and unmarried 15-19 year olds separately, then estimates were combined assuming 21.7% of 15-19 year olds were married and 19.4% of unmarried girls were sexually active.

**Table S3 Design Effect**

| <b>Setting</b>              | <b>ICC<sup>1</sup></b> | <b>Number of clusters</b> | <b>Eligible girls/cluster</b> | <b>Design effect (DE)<sup>2</sup></b> |
|-----------------------------|------------------------|---------------------------|-------------------------------|---------------------------------------|
| <i>Nigeria – Nasarawa</i>   | <i>0.04</i>            | <i>1148</i>               | <i>4</i>                      | <i>1.12</i>                           |
| <i>Nigeria- Ogun</i>        | <i>0.01</i>            | <i>708</i>                | <i>17</i>                     | <i>1.16</i>                           |
| <i>Ethiopia</i>             | <i>0.02</i>            | <i>45</i>                 | <i>28</i>                     | <i>1.54</i>                           |
| <i>Tanzania- scenario 1</i> | <i>0.005</i>           | <i>30</i>                 | <i>110</i>                    | <i>1.5</i>                            |
| <i>Tanzania- scenario 2</i> | <i>0.012</i>           | <i>30</i>                 | <i>84</i>                     | <i>2.0</i>                            |

<sup>1</sup>The Intraclass correlation coefficient (ICC) is the ratio of the between-cluster variance to the total variance (both between and within clusters), and has a value between 0 and 1. If ICC is 0 then there is no clustering so individuals within clusters are no more similar than individuals from different clusters. ICC estimates for this study were based on ICC reported in the literature and our knowledge of the prevalence of the outcome, size of cluster, likelihood of diversity within clusters.

(Pagel et al, Trials 2011 (<https://trialsjournal.biomedcentral.com/articles/10.1186/1745-6215-12-151>)).

<sup>2</sup> DE = (1+ICC (cluster size-1))

**Table S4 Sample size for adults**

| <i>Study design</i>              | <i>Outcome 2017</i>     | <i>Outcome 2019</i>     | <i>Number needed (n)</i> | <i>DE</i> | <i>Total sample of adults (n X DE)</i> | <i>Protocol target sample size</i> |
|----------------------------------|-------------------------|-------------------------|--------------------------|-----------|----------------------------------------|------------------------------------|
| <i>Difference in differences</i> | <i>Intervention 40%</i> | <i>Intervention 45%</i> | 232                      | 1.1       | 255                                    | 250                                |
|                                  | <i>Comparison 40%</i>   | <i>Comparison 63%</i>   |                          |           |                                        |                                    |
| <i>Before-after study design</i> | <i>40%</i>              | <i>62%</i>              | 80                       | 1.5       | 120                                    | 127/128                            |

Note: We calculated the target number of adults to have 80% power to detect an increase in an attitudinal variable (undefined) from approximately 40% in 2017 to approximately 60% in 2019. The final sample size of adults was then adjusted slightly to be a fixed proportion of the target number of girls to be interviewed.
